# Supplementary material for: Orthovanadate cofactor chemistry of marine bromoperoxidases
Source: Royal Society of Chemistry journal article supplement (doi:10.1039/d4nj02575j), 2025-01-01
Supplement: d4nj02575j1.pdf [file d4nj02575j1.pdf]

*Supplementary Data*

Orthovanadate Cofactor Chemistry of Marine Bromoperoxidases

Jens Hartung\*

*Fachbereich Chemie, Organische Chemie, Rheinland-Pfälzische Technische Universität  
Kaiserslautern-Landau,  
Erwin-Schrödinger-Straße, D-67663 Kaiserslautern, Germany*

**Contents**

|   |                                                        |     |
|---|--------------------------------------------------------|-----|
| 1 | General Remarks .....                                  | S2  |
| 2 | Molecular Modelling .....                              | S3  |
| 3 | Orthovanadium Acid and Isoorthovanadium Acid.....      | S4  |
| 4 | Orthovanadium Acid with Hydron .....                   | S10 |
| 5 | Hydrates of <i>cis</i> -Dioxidovanadium(V) .....       | S14 |
| 6 | Metavanadium Peroxoic Acid and its Conjugate Base..... | S20 |
| 7 | Water Tetramer and Hydronium.....                      | S35 |
| 8 | References.....                                        | S37 |

# 1 General Remarks

## 1.1 References

The list of references (Section 8) refers exclusively to the *Supplementary data* and is therefore independent from the associated article.

## 1.2 Molecular graphics

Ball-and-stick graphics displayed in sections 3–7 were generated with thie ChemPlus add-on (Version 1.6) to HyperChem 4.5.<sup>1</sup> Atomic coordinates for the graphics are taken from B3LYP/6-311++G(d,p)-minimized energy functions archived in Gaussian03-logfiles.<sup>2</sup> Transforming Gaussian logfiles into HyperChem input was achieved by the Open-Babel-feeware.<sup>3</sup> The selected color code depicts vanadium in yellow, oxygen in red, and hydrogen in white.

## 2 Molecular Modelling

### 2.1 Electronic structure methods

Structures and energies were computed with the density functional/Hartree-Fock-hybrid model B3LYP in combination with the split valence triple- $\zeta$  basis set B3LYP/6-311++G(d,p) implemented in Gaussian03-suite of program (Revision E.01).<sup>2</sup> Supplemental energy function minimizations for predicting relative energies of isomers on the  $\text{H}_4\text{VO}_4^+$ -energy surface using a semiempiric hybrid density functional with perturbative second-order correlation (B2PLYP) combined with the split valence triple- $\zeta$  basis set B3LYP/6-311++G(d,p) were performed with the Gaussian09-suite of program (Revision D.01)<sup>4</sup>.

All energy functions were minimized without constraining symmetry or internal coordinates, using the Berni-algorithm in combination with the tight-option and the ultrafine grid for integration. Minimum structures were identified as such from calculated vibrational spectra by the absence of imaginary vibrational modes.

### 2.2 Thermochemical model

Thermochemical analysis was performed from minimum structures on the associated potential energy surface, as secured by absence of negative normal modes in calculated vibrational spectra.

Gibbs free energies ( $G^\circ$ ) were calculated for temperature of 298.15 Kelvin and a pressure of 1 atmosphere, based on the thermochemical model implemented in the Gaussian-software and unscaled frequency calculations. Likewise obtained Gibbs free energies are corrected for zero-point vibrational energy, thermal contributions, and molecular entropy.

### 3 Orthovanadium Acid and Isoorthovanadium Acid

#### 3.1 Orthovanadium Acid

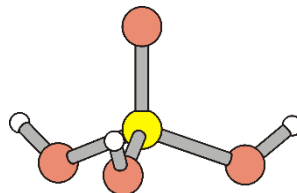

**Figure S1.** Calculated minimum structure of orthovanadium acid.

**(i) B3LYP/6-311++G\*\*//B3LYP/6-311++G\*\***

Standard orientation:

| Center Number | Atomic Number | Atomic Type | Coordinates (Angstroms) |           |           |
|---------------|---------------|-------------|-------------------------|-----------|-----------|
|               |               |             | X                       | Y         | Z         |
| 1             | 23            | 0           | 0.000000                | 0.000000  | 0.027767  |
| 2             | 8             | 0           | 0.000000                | 0.000000  | 1.596654  |
| 3             | 8             | 0           | 0.000000                | 1.677284  | -0.561099 |
| 4             | 8             | 0           | 1.452570                | -0.838642 | -0.561099 |
| 5             | 8             | 0           | -1.452570               | -0.838642 | -0.561099 |
| 6             | 1             | 0           | -0.000352               | 2.446734  | 0.018161  |
| 7             | 1             | 0           | 2.119110                | -1.223062 | 0.018161  |
| 8             | 1             | 0           | -2.118758               | -1.223672 | 0.018161  |

Zero-point correction= 0.043521 (Hartree/Particle)  
Thermal correction to Energy= 0.050709  
Thermal correction to Enthalpy= 0.051653  
Thermal correction to Gibbs Free Energy= 0.014104  
Sum of electronic and zero-point Energies= -1246.940727  
Sum of electronic and thermal Energies= -1246.933538  
Sum of electronic and thermal Enthalpies= -1246.932594  
Sum of electronic and thermal Free Energies= -1246.970143

Version=AM64L-G03RevE.01\State=1-A\HF=-1246.9842473\RMSD=1.947e-10\  
RMSF=1.363e-05\ PG=C03 [C3(V1O1),X(H3O3)]\NImag=0\@.

(ii) NBO-analysis – B3LYP/6-31G\*// B3LYP/6-311++G\*\*

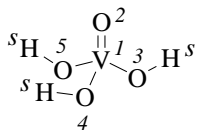

| No. | (Occupancy) | Bond orbital/          | Coefficients/ | Hybrids                     |
|-----|-------------|------------------------|---------------|-----------------------------|
| 1.  | (1.92324)   | <b>BD (1) V 1- O 2</b> |               |                             |
|     | (28.98%)    | 0.5383* V 1            | s(28.30%)     | p(0.05%) d(71.37%) f(0.28%) |
|     | (71.02%)    | 0.8427* O 2            | s(11.63%)     | p(88.18%) d(0.19%)          |
| 2.  | (1.98494)   | <b>BD (2) V 1- O 2</b> |               |                             |
|     | (22.62%)    | 0.4756* V 1            | s(0.00%)      | p(1.11%) d(98.70%) f(0.20%) |
|     | (77.38%)    | 0.8796* O 2            | s(0.00%)      | p(99.89%) d(0.11%)          |
| 3.  | (1.98488)   | <b>BD (3) V 1- O 2</b> |               |                             |
|     | (22.62%)    | 0.4756* V 1            | s(0.00%)      | p(1.11%) d(98.69%) f(0.20%) |
|     | (77.38%)    | 0.8797* O 2            | s(0.00%)      | p(99.89%) d(0.11%)          |
| 4.  | (1.97440)   | <b>BD (1) V 1- O 3</b> |               |                             |
|     | (19.02%)    | 0.4361* V 1            | s(23.36%)     | p(0.54%) d(75.94%) f(0.16%) |
|     | (80.98%)    | 0.8999* O 3            | s(14.67%)     | p(85.25%) d(0.08%)          |
| 5.  | (1.97440)   | <b>BD (1) V 1- O 4</b> |               |                             |
|     | (19.01%)    | 0.4360* V 1            | s(23.39%)     | p(0.53%) d(75.91%) f(0.16%) |
|     | (80.99%)    | 0.8999* O 4            | s(14.67%)     | p(85.25%) d(0.08%)          |
| 6.  | (1.97427)   | <b>BD (1) V 1- O 5</b> |               |                             |
|     | (19.10%)    | 0.4370* V 1            | s(23.36%)     | p(0.54%) d(75.94%) f(0.16%) |
|     | (80.90%)    | 0.8995* O 5            | s(14.59%)     | p(85.33%) d(0.08%)          |
| 23. | (1.97474)   | <b>LP (1) O 2</b>      | s(88.39%)     | p(11.61%) d(0.00%)          |
| 24. | (1.95032)   | <b>LP (1) O 3</b>      | s(59.64%)     | p(40.30%) d(0.06%)          |
| 25. | (1.81299)   | <b>LP (2) O 3</b>      | s(0.00%)      | p(99.93%) d(0.07%)          |
| 26. | (1.95035)   | <b>LP (1) O 4</b>      | s(59.64%)     | p(40.30%) d(0.06%)          |
| 27. | (1.81352)   | <b>LP (2) O 4</b>      | s(0.00%)      | p(99.93%) d(0.07%)          |
| 28. | (1.95005)   | <b>LP (1) O 5</b>      | s(59.75%)     | p(40.19%) d(0.06%)          |
| 29. | (1.81161)   | <b>LP (2) O 5</b>      | s(0.00%)      | p(99.93%) d(0.07%)          |

Second order perturbation theory analysis of Fock-matrix for  
*syn/syn/syn*-orthovanadium acid in NBO-basis(threshold for printing:  
 0.50 kcal/mol)

| Donor NBO (i)  | Acceptor NBO (j)    | kcal/mol | a.u. | a.u.  |
|----------------|---------------------|----------|------|-------|
| 23. LP (1) O 2 | 94. BD*(1) V 1- O 2 | 2.45     | 1.14 | 0.048 |
| 23. LP (1) O 2 | 97. BD*(1) V 1- O 3 | 1.65     | 1.06 | 0.039 |
| 23. LP (1) O 2 | 98. BD*(1) V 1- O 4 | 1.66     | 1.06 | 0.039 |
| 23. LP (1) O 2 | 99. BD*(1) V 1- O 5 | 1.65     | 1.06 | 0.039 |
| 24. LP (1) O 3 | 94. BD*(1) V 1- O 2 | 5.04     | 0.81 | 0.058 |
| 24. LP (1) O 3 | 96. BD*(3) V 1- O 2 | 9.20     | 0.62 | 0.069 |
| 24. LP (1) O 3 | 98. BD*(1) V 1- O 4 | 0.95     | 0.73 | 0.024 |
| 24. LP (1) O 3 | 99. BD*(1) V 1- O 5 | 0.95     | 0.73 | 0.024 |
| 25. LP (2) O 3 | 95. BD*(2) V 1- O 2 | 5.42     | 0.25 | 0.033 |
| 25. LP (2) O 3 | 98. BD*(1) V 1- O 4 | 9.42     | 0.36 | 0.052 |
| 25. LP (2) O 3 | 99. BD*(1) V 1- O 5 | 9.45     | 0.36 | 0.052 |
| 26. LP (1) O 4 | 94. BD*(1) V 1- O 2 | 5.04     | 0.81 | 0.058 |
| 26. LP (1) O 4 | 95. BD*(2) V 1- O 2 | 6.89     | 0.62 | 0.060 |
| 26. LP (1) O 4 | 96. BD*(3) V 1- O 2 | 2.30     | 0.62 | 0.034 |
| 26. LP (1) O 4 | 97. BD*(1) V 1- O 3 | 0.95     | 0.73 | 0.024 |
| 26. LP (1) O 4 | 99. BD*(1) V 1- O 5 | 0.94     | 0.73 | 0.024 |
| 27. LP (2) O 4 | 95. BD*(2) V 1- O 2 | 1.36     | 0.25 | 0.017 |
| 27. LP (2) O 4 | 96. BD*(3) V 1- O 2 | 4.05     | 0.25 | 0.029 |
| 27. LP (2) O 4 | 97. BD*(1) V 1- O 3 | 9.41     | 0.36 | 0.052 |
| 27. LP (2) O 4 | 99. BD*(1) V 1- O 5 | 9.43     | 0.36 | 0.052 |
| 28. LP (1) O 5 | 94. BD*(1) V 1- O 2 | 5.04     | 0.81 | 0.058 |
| 28. LP (1) O 5 | 95. BD*(2) V 1- O 2 | 6.93     | 0.62 | 0.060 |
| 28. LP (1) O 5 | 96. BD*(3) V 1- O 2 | 2.31     | 0.62 | 0.034 |
| 28. LP (1) O 5 | 97. BD*(1) V 1- O 3 | 0.95     | 0.73 | 0.024 |
| 28. LP (1) O 5 | 98. BD*(1) V 1- O 4 | 0.95     | 0.73 | 0.024 |
| 29. LP (2) O 5 | 95. BD*(2) V 1- O 2 | 1.36     | 0.25 | 0.017 |
| 29. LP (2) O 5 | 96. BD*(3) V 1- O 2 | 4.08     | 0.25 | 0.029 |
| 29. LP (2) O 5 | 97. BD*(1) V 1- O 3 | 9.44     | 0.36 | 0.052 |
| 29. LP (2) O 5 | 98. BD*(1) V 1- O 4 | 9.45     | 0.36 | 0.052 |

Natural bond orbital (NBO)-energies

| NBO                | Occupancy | Energy / a.u. |
|--------------------|-----------|---------------|
| 1. BD (1) V 1- O 2 | 1.92324   | -0.60266      |
| 2. BD (2) V 1- O 2 | 1.98494   | -0.37606      |
| 3. BD (3) V 1- O 2 | 1.98488   | -0.37605      |
| 4. BD (1) V 1- O 3 | 1.97440   | -0.54966      |
| 5. BD (1) V 1- O 4 | 1.97440   | -0.54983      |
| 6. BD (1) V 1- O 5 | 1.97427   | -0.54806      |

## 3.2 Isoorthovanadium Acid

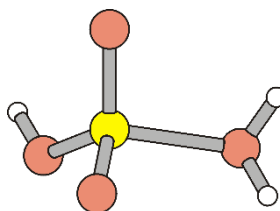

**Figure S2.** Calculated minimum structure of isoorthovanadium acid.

**(i) B3LYP/6-311++G\*\*//B3LYP/6-311++G\*\***

Standard orientation:

| Center Number | Atomic Number | Atomic Type | Coordinates (Angstroms) |           |           |
|---------------|---------------|-------------|-------------------------|-----------|-----------|
|               |               |             | X                       | Y         | Z         |
| 1             | 8             | 0           | -0.098149               | -0.775750 | 1.455103  |
| 2             | 23            | 0           | -0.149966               | -0.109804 | 0.000621  |
| 3             | 8             | 0           | 0.018815                | -1.191444 | -1.167499 |
| 4             | 8             | 0           | -1.486321               | 1.069845  | -0.272348 |
| 5             | 8             | 0           | 1.693194                | 0.861947  | -0.061222 |
| 6             | 1             | 0           | -2.041580               | 1.412243  | 0.435685  |
| 7             | 1             | 0           | 2.225375                | 0.761791  | 0.738502  |
| 8             | 1             | 0           | 2.245129                | 0.634677  | -0.820730 |

Zero-point correction= 0.045039 (Hartree/Particle)  
Thermal correction to Energy= 0.052530  
Thermal correction to Enthalpy= 0.053474  
Thermal correction to Gibbs Free Energy= 0.013661  
Sum of electronic and zero-point Energies= -1246.903014  
Sum of electronic and thermal Energies= -1246.895524  
Sum of electronic and thermal Enthalpies= -1246.894580  
Sum of electronic and thermal Free Energies= -1246.934392

Version=EM64L-G09RevD.01\State=1-A\HF=-1246.9480533\RMSD=9.299e-09\  
RMSF=3.107e-06\PG=C01 [X(H3O4V1)]\NImag=0\@.

(ii) NBO-analysis – B3LYP/6-31G\*// B3LYP/6-311++G\*\*

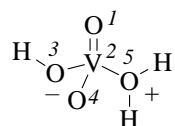

| No. | (Occupancy) | Bond orbital/          | Coefficients/ | Hybrids                      |
|-----|-------------|------------------------|---------------|------------------------------|
| 1.  | (1.91863)   | <b>BD (1) O 1- V 2</b> |               |                              |
|     | (72.51%)    | 0.8515* O 1            | s(10.45%)     | p(89.37%) d(0.18%)           |
|     | (27.49%)    | 0.5243* V 2            | s(13.23%)     | p(3.13%) d(82.62%) f(1.02%)  |
| 2.  | (1.89108)   | <b>BD (2) O 1- V 2</b> |               |                              |
|     | (89.06%)    | 0.9437* O 1            | s(0.27%)      | p(99.65%) d(0.09%)           |
|     | (10.94%)    | 0.3307* V 2            | s(0.71%)      | p(28.95%) d(63.98%) f(6.37%) |
| 3.  | (1.93964)   | <b>BD (3) O 1- V 2</b> |               |                              |
|     | (77.74%)    | 0.8817* O 1            | s(0.02%)      | p(99.87%) d(0.11%)           |
|     | (22.26%)    | 0.4718* V 2            | s(6.53%)      | p(8.03%) d(84.42%) f(1.02%)  |
| 4.  | (1.91993)   | <b>BD (1) V 2- O 4</b> |               |                              |
|     | (28.10%)    | 0.5301* V 2            | s(10.56%)     | p(3.43%) d(84.60%) f(1.40%)  |
|     | (71.90%)    | 0.8479* O 4            | s(10.17%)     | p(89.65%) d(0.18%)           |
| 5.  | (1.88747)   | <b>BD (2) V 2- O 4</b> |               |                              |
|     | (10.71%)    | 0.3273* V 2            | s(1.96%)      | p(26.89%) d(64.42%) f(6.74%) |
|     | (89.29%)    | 0.9449* O 4            | s(0.11%)      | p(99.80%) d(0.09%)           |
| 6.  | (1.92801)   | <b>BD (3) V 2- O 4</b> |               |                              |
|     | (22.17%)    | 0.4709* V 2            | s(8.04%)      | p(9.26%) d(82.03%) f(0.67%)  |
|     | (77.83%)    | 0.8822* O 4            | s(0.02%)      | p(99.87%) d(0.11%)           |
| 7.  | (1.93450)   | <b>BD (1) V 2- O 5</b> |               |                              |
|     | (13.42%)    | 0.3664* V 2            | s(42.50%)     | p(5.87%) d(51.23%) f(0.40%)  |
|     | (86.58%)    | 0.9305* O 5            | s(15.09%)     | p(84.84%) d(0.07%)           |
| 24. | (1.97479)   | <b>LP (1) O 1</b>      | s(89.27%)     | p(10.73%) d(0.00%)           |
| 25. | (1.98784)   | <b>LP (1) O 3</b>      | s(21.71%)     | p(78.22%) d(0.08%)           |
| 26. | (1.88160)   | <b>LP (2) O 3</b>      | s(28.62%)     | p(71.36%) d(0.02%)           |
| 27. | (1.97484)   | <b>LP (1) O 4</b>      | s(89.70%)     | p(10.30%) d(0.00%)           |
| 28. | (1.96089)   | <b>LP (1) O 5</b>      | s(55.44%)     | p(44.51%) d(0.06%)           |
| 29. | (1.81893)   | <b>LP (2) O 5</b>      | s(3.67%)      | p(96.26%) d(0.06%)           |



Second order perturbation theory analysis of Fock-matrix for  
 isoorthovanadium acid in NBO-basis(threshold for printing: 0.50  
 kcal/mol)

| Donor NBO (i)         | Acceptor NBO (j)    | kcal/mol | a.u. | a.u.  |
|-----------------------|---------------------|----------|------|-------|
| within unit 1         |                     |          |      |       |
| 24. LP (1) O 1        | 95. BD*(3) O 1- V 2 | 1.30     | 0.98 | 0.032 |
| 24. LP (1) O 1        | 96. BD*(1) V 2- O 4 | 0.83     | 1.07 | 0.027 |
| 24. LP (1) O 1        | 97. BD*(2) V 2- O 4 | 6.23     | 1.21 | 0.082 |
| 24. LP (1) O 1        | 99. BD*(1) V 2- O 5 | 4.41     | 1.11 | 0.064 |
| 27. LP (1) O 4        | 93. BD*(1) O 1- V 2 | 1.08     | 1.06 | 0.031 |
| 27. LP (1) O 4        | 94. BD*(2) O 1- V 2 | 5.29     | 1.21 | 0.074 |
| 27. LP (1) O 4        | 98. BD*(3) V 2- O 4 | 1.74     | 0.97 | 0.037 |
| 27. LP (1) O 4        | 99. BD*(1) V 2- O 5 | 6.61     | 1.10 | 0.079 |
| 28. LP (1) O 5        | 93. BD*(1) O 1- V 2 | 4.43     | 0.74 | 0.052 |
| 28. LP (1) O 5        | 94. BD*(2) O 1- V 2 | 3.22     | 0.88 | 0.050 |
| 28. LP (1) O 5        | 95. BD*(3) O 1- V 2 | 0.81     | 0.65 | 0.021 |
| 28. LP (1) O 5        | 99. BD*(1) V 2- O 5 | 0.60     | 0.78 | 0.020 |
| 29. LP (2) O 5        | 93. BD*(1) O 1- V 2 | 3.37     | 0.43 | 0.034 |
| 29. LP (2) O 5        | 94. BD*(2) O 1- V 2 | 3.19     | 0.57 | 0.038 |
| 29. LP (2) O 5        | 96. BD*(1) V 2- O 4 | 6.35     | 0.43 | 0.047 |
| 29. LP (2) O 5        | 97. BD*(2) V 2- O 4 | 6.29     | 0.57 | 0.054 |
| from unit 1 to unit 2 |                     |          |      |       |
| None above threshold  |                     |          |      |       |
| from unit 2 to unit 1 |                     |          |      |       |
| 25. LP (1) O 3        | 93. BD*(1) O 1- V 2 | 0.29     | 0.65 | 0.013 |
| 25. LP (1) O 3        | 95. BD*(3) O 1- V 2 | 1.43     | 0.56 | 0.026 |
| 25. LP (1) O 3        | 96. BD*(1) V 2- O 4 | 0.36     | 0.65 | 0.014 |
| 25. LP (1) O 3        | 98. BD*(3) V 2- O 4 | 1.82     | 0.56 | 0.029 |
| 26. LP (2) O 3        | 93. BD*(1) O 1- V 2 | 0.69     | 0.73 | 0.020 |
| 26. LP (2) O 3        | 94. BD*(2) O 1- V 2 | 0.41     | 0.87 | 0.017 |
| 26. LP (2) O 3        | 95. BD*(3) O 1- V 2 | 9.61     | 0.64 | 0.070 |
| 26. LP (2) O 3        | 96. BD*(1) V 2- O 4 | 0.92     | 0.72 | 0.023 |
| 26. LP (2) O 3        | 97. BD*(2) V 2- O 4 | 1.09     | 0.87 | 0.028 |
| 26. LP (2) O 3        | 98. BD*(3) V 2- O 4 | 10.39    | 0.63 | 0.073 |
| 26. LP (2) O 3        | 99. BD*(1) V 2- O 5 | 8.16     | 0.77 | 0.071 |
| within unit 2         |                     |          |      |       |
| None above threshold  |                     |          |      |       |

Natural bond orbital (NBO)-energies

| NBO                     | Occupancy | Energy / a.u. |
|-------------------------|-----------|---------------|
| Molecular unit 1 (HO3V) |           |               |
| 1. BD (1) O 1- V 2      | 1.91863   | -0.51506      |
| 2. BD (2) O 1- V 2      | 1.89108   | -0.28241      |
| 3. BD (3) O 1- V 2      | 1.93964   | -0.30974      |
| 4. BD (1) V 2- O 4      | 1.91993   | -0.50426      |
| 5. BD (2) V 2- O 4      | 1.88747   | -0.27440      |
| 6. BD (3) V 2- O 4      | 1.92801   | -0.30343      |
| 7. BD (1) V 2- O 5      | 1.93450   | -0.50290      |

## 4 Orthovanadium Acid with Hydron

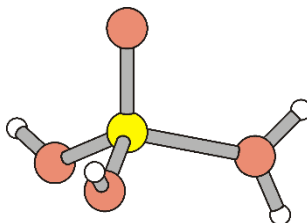

**Figure S3.** Calculated minimum structure of monoprotonated orthovanadium acid.

**(i) B3LYP/6-311++G\*\*//B3LYP/6-311++G\*\***

Standard orientation:

| Center Number | Atomic Number | Atomic Type | Coordinates (Angstroms) |           |           |
|---------------|---------------|-------------|-------------------------|-----------|-----------|
|               |               |             | X                       | Y         | Z         |
| 1             | 8             | 0           | 0.189988                | 0.000007  | 1.590928  |
| 2             | 23            | 0           | 0.117926                | -0.000000 | 0.044648  |
| 3             | 8             | 0           | 0.818159                | -1.429341 | -0.628856 |
| 4             | 8             | 0           | -1.862659               | 0.000004  | -0.305113 |
| 5             | 8             | 0           | 0.818174                | 1.429328  | -0.628868 |
| 6             | 1             | 0           | -2.540194               | 0.000036  | 0.388973  |
| 7             | 1             | 0           | 1.204502                | 2.225842  | -0.232214 |
| 8             | 1             | 0           | 1.204475                | -2.225858 | -0.232195 |
| 9             | 1             | 0           | -2.290377               | -0.000007 | -1.176197 |

Zero-point correction= 0.055888 (Hartree/Particle)  
Thermal correction to Energy= 0.063688  
Thermal correction to Enthalpy= 0.064632  
Thermal correction to Gibbs Free Energy= 0.024575  
Sum of electronic and zero-point Energies= -1247.237953  
Sum of electronic and thermal Energies= -1247.230154  
Sum of electronic and thermal Enthalpies= -1247.229209  
Sum of electronic and thermal Free Energies= -1247.269266

Version=EM64L-G09RevD.01\State=1-A\HF=-1247.2938411\RMSD=8.520e-09\  
RMSF=1.461e-06\PG=C01 [X(H4O4V1)]\NImag=0\@.

(ii) **B2PLYP/6-311++G\*\*//B2PLYP/6-311++G\*\***

Standard orientation:

| Center<br>Number | Atomic<br>Number | Atomic<br>Type | Coordinates (Angstroms) |           |           |
|------------------|------------------|----------------|-------------------------|-----------|-----------|
|                  |                  |                | X                       | Y         | Z         |
| 1                | 8                | 0              | -0.182550               | -0.000006 | 1.618744  |
| 2                | 23               | 0              | -0.109251               | -0.000000 | 0.020903  |
| 3                | 8                | 0              | -0.850962               | -1.452702 | -0.612948 |
| 4                | 8                | 0              | -0.850952               | 1.452711  | -0.612938 |
| 5                | 8                | 0              | 1.895570                | -0.000003 | -0.307011 |
| 6                | 1                | 0              | 2.573384                | -0.000021 | 0.383509  |
| 7                | 1                | 0              | -1.240859               | -2.233341 | -0.189948 |
| 8                | 1                | 0              | -1.240844               | 2.233351  | -0.189934 |
| 9                | 1                | 0              | 2.332256                | 0.000012  | -1.171174 |

Zero-point correction= 0.055234 (Hartree/Particle)  
Thermal correction to Energy= 0.063255  
Thermal correction to Enthalpy= 0.064200  
Thermal correction to Gibbs Free Energy= 0.023560  
Sum of electronic and zero-point Energies= -1246.751673  
Sum of electronic and thermal Energies= -1246.743651  
Sum of electronic and thermal Enthalpies= -1246.742707  
Sum of electronic and thermal Free Energies= -1246.783347

Version=EM64L-G09RevD.01\State=1-A\HF=-1246.3685856\MP2=-1246.8069063\  
RMSD=1.874e-09\RMSF=1.900e-05\PG=C01 [X(H4O4V1)]\NImag=0\@.

(iii) NBO-analysis – B3LYP/6-31G\*// B3LYP/6-311++G\*\*

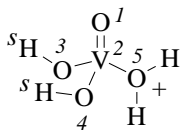

| No. | (Occupancy) | Bond orbital/          | Coefficients/ | Hybrids                      |
|-----|-------------|------------------------|---------------|------------------------------|
| 1.  | (1.92556)   | <b>BD (1) O 1- V 2</b> |               |                              |
|     | (68.87%)    | 0.8299* O 1            | s(10.11%)     | p(89.67%) d(0.23%)           |
|     | (31.13%)    | 0.5579* V 2            | s(21.57%)     | p(0.53%) d(77.60%) f(0.30%)  |
| 2.  | (1.92302)   | <b>BD (2) O 1- V 2</b> |               |                              |
|     | (79.59%)    | 0.8921* O 1            | s(0.00%)      | p(99.87%) d(0.13%)           |
|     | (20.41%)    | 0.4518* V 2            | s(0.00%)      | p(18.46%) d(80.19%) f(1.34%) |
| 3.  | (1.95832)   | <b>BD (3) O 1- V 2</b> |               |                              |
|     | (74.22%)    | 0.8615* O 1            | s(0.03%)      | p(99.82%) d(0.15%)           |
|     | (25.78%)    | 0.5077* V 2            | s(5.16%)      | p(2.35%) d(92.22%) f(0.26%)  |
| 4.  | (1.89809)   | <b>BD (1) V 2- O 3</b> |               |                              |
|     | (16.26%)    | 0.4032* V 2            | s(27.85%)     | p(13.76%) d(57.21%) f(1.18%) |
|     | (83.74%)    | 0.9151* O 3            | s(15.48%)     | p(84.44%) d(0.08%)           |
| 5.  | (1.92759)   | <b>BD (2) V 2- O 3</b> |               |                              |
|     | (11.21%)    | 0.3348* V 2            | s(3.70%)      | p(22.34%) d(72.08%) f(1.87%) |
|     | (88.79%)    | 0.9423* O 3            | s(0.25%)      | p(99.69%) d(0.06%)           |
| 6.  | (1.89809)   | <b>BD (1) V 2- O 4</b> |               |                              |
|     | (16.26%)    | 0.4032* V 2            | s(27.85%)     | p(13.76%) d(57.21%) f(1.18%) |
|     | (83.74%)    | 0.9151* O 4            | s(15.48%)     | p(84.44%) d(0.08%)           |
| 7.  | (1.92759)   | <b>BD (2) V 2- O 4</b> |               |                              |
|     | (11.21%)    | 0.3348* V 2            | s(3.70%)      | p(22.34%) d(72.08%) f(1.87%) |
|     | (88.79%)    | 0.9423* O 4            | s(0.25%)      | p(99.69%) d(0.06%)           |
| 25. | (1.97218)   | <b>LP (1) O 1</b>      | s(89.88%)     | p(10.12%) d(0.00%)           |
| 26. | (1.92922)   | <b>LP (1) O 3</b>      | s(56.90%)     | p(43.03%) d(0.06%)           |
| 27. | (1.92922)   | <b>LP (1) O 4</b>      | s(56.90%)     | p(43.03%) d(0.06%)           |
| 28. | (1.96568)   | <b>LP (1) O 5</b>      | s(0.00%)      | p(99.98%) d(0.02%)           |
| 29. | (1.86150)   | <b>LP (1) O 5</b>      | s(52.00%)     | p(47.99%) d(0.01%)           |

Second order perturbation theory analysis of Fock-matrix for *syn/syn*-orthovanadium acid with hydron in NBO-basis(threshold for printing: 0.50 kcal/mol)

| Donor NBO (i)         | Acceptor NBO (j)     | kcal/mol | a.u. | a.u.  |
|-----------------------|----------------------|----------|------|-------|
| within unit 1         |                      |          |      |       |
| 25. LP (1) O 1        | 94. BD*(1) O 1- V 2  | 1.75     | 1.13 | 0.040 |
| 25. LP (1) O 1        | 96. BD*(3) O 1- V 2  | 0.66     | 0.98 | 0.023 |
| 25. LP (1) O 1        | 97. BD*(1) V 2- O 3  | 1.48     | 1.21 | 0.039 |
| 25. LP (1) O 1        | 99. BD*(1) V 2- O 4  | 1.48     | 1.21 | 0.039 |
| 26. LP (1) O 3        | 94. BD*(1) O 1- V 2  | 6.24     | 0.76 | 0.062 |
| 26. LP (1) O 3        | 95. BD*(2) O 1- V 2  | 10.18    | 0.75 | 0.079 |
| 26. LP (1) O 3        | 96. BD*(3) O 1- V 2  | 1.00     | 0.62 | 0.022 |
| 26. LP (1) O 3        | 97. BD*(1) V 2- O 3  | 0.69     | 0.85 | 0.022 |
| 26. LP (1) O 3        | 98. BD*(2) V 2- O 3  | 1.24     | 0.76 | 0.028 |
| 26. LP (1) O 3        | 99. BD*(1) V 2- O 4  | 1.11     | 0.85 | 0.028 |
| 27. LP (1) O 4        | 94. BD*(1) O 1- V 2  | 6.24     | 0.76 | 0.062 |
| 27. LP (1) O 4        | 95. BD*(2) O 1- V 2  | 10.18    | 0.75 | 0.079 |
| 27. LP (1) O 4        | 96. BD*(3) O 1- V 2  | 1.00     | 0.62 | 0.022 |
| 27. LP (1) O 4        | 97. BD*(1) V 2- O 3  | 1.11     | 0.85 | 0.028 |
| 27. LP (1) O 4        | 99. BD*(1) V 2- O 4  | 0.69     | 0.85 | 0.022 |
| 27. LP (1) O 4        | 100. BD*(2) V 2- O 4 | 1.24     | 0.76 | 0.028 |
| from unit 1 to unit 2 |                      |          |      |       |
| None above threshold  |                      |          |      |       |
| from unit 2 to unit 1 |                      |          |      |       |
| 28. LP (1) O 5        | 97. BD*(1) V 2- O 3  | 0.75     | 0.58 | 0.019 |
| 28. LP (1) O 5        | 98. BD*(2) V 2- O 3  | 1.39     | 0.49 | 0.024 |
| 28. LP (1) O 5        | 99. BD*(1) V 2- O 4  | 0.75     | 0.58 | 0.019 |
| 28. LP (1) O 5        | 100. BD*(2) V 2- O 4 | 1.39     | 0.49 | 0.024 |
| 29. LP (2) O 5        | 96. BD*(3) O 1- V 2  | 13.50    | 0.69 | 0.087 |
| 29. LP (2) O 5        | 97. BD*(1) V 2- O 3  | 3.50     | 0.92 | 0.051 |
| 29. LP (2) O 5        | 98. BD*(2) V 2- O 3  | 10.46    | 0.84 | 0.084 |
| 29. LP (2) O 5        | 99. BD*(1) V 2- O 4  | 3.50     | 0.92 | 0.051 |
| 29. LP (2) O 5        | 100. BD*(2) V 2- O 4 | 10.46    | 0.84 | 0.084 |
| within unit 2         |                      |          |      |       |
| 29. LP (2) O 5        | 103. BD*(1) O 5- H 6 | 0.50     | 1.16 | 0.022 |
| 29. LP (2) O 5        | 104. BD*(1) O 5- H 9 | 0.62     | 1.16 | 0.025 |

Natural bond orbital (NBO)-energies

| NBO                | Occupancy | Energy / a.u. |
|--------------------|-----------|---------------|
| 1. BD (1) O 1- V 2 | 1.92556   | -0.80315      |
| 2. BD (2) O 1- V 2 | 1.92302   | -0.54645      |
| 3. BD (3) O 1- V 2 | 1.95832   | -0.57932      |
| 4. BD (1) V 2- O 3 | 1.89809   | -0.73577      |
| 5. BD (2) V 2- O 3 | 1.92759   | -0.53036      |
| 6. BD (1) V 2- O 4 | 1.89809   | -0.73577      |
| 7. BD (2) V 2- O 4 | 1.92759   | -0.53036      |

## 5 Hydrates of *cis*-Dioxidovanadium(V)

### 5.1 *cis*-Dioxidovanadium(V) dihydrate

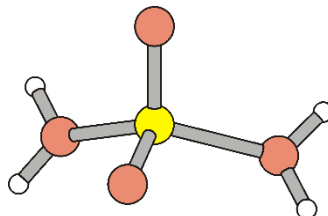

**Figure S4.** Calculated minimum structure of *cis*-dioxidovanadium(V) dihydrate.

(i) **B3LYP/6-311++G\*\*//B3LYP/6-311++G\*\***

Standard orientation:

| Center Number | Atomic Number | Atomic Type | Coordinates (Angstroms) |           |           |
|---------------|---------------|-------------|-------------------------|-----------|-----------|
|               |               |             | X                       | Y         | Z         |
| 1             | 8             | 0           | -0.000037               | 1.020701  | -1.278666 |
| 2             | 23            | 0           | -0.000006               | 0.108535  | -0.000007 |
| 3             | 8             | 0           | 1.750136                | -0.923131 | -0.000403 |
| 4             | 8             | 0           | 0.000109                | 1.019392  | 1.279589  |
| 5             | 8             | 0           | -1.750181               | -0.923075 | -0.000325 |
| 6             | 1             | 0           | -2.310674               | -1.011412 | -0.787286 |
| 7             | 1             | 0           | -2.310442               | -1.012248 | 0.786707  |
| 8             | 1             | 0           | 2.310524                | -1.011710 | -0.787410 |
| 9             | 1             | 0           | 2.310506                | -1.012039 | 0.786582  |

Zero-point correction= 0.057362 (Hartree/Particle)  
Thermal correction to Energy= 0.065483  
Thermal correction to Enthalpy= 0.066428  
Thermal correction to Gibbs Free Energy= 0.025237  
Sum of electronic and zero-point Energies= -1247.216041  
Sum of electronic and thermal Energies= -1247.207920  
Sum of electronic and thermal Enthalpies= -1247.206975  
Sum of electronic and thermal Free Energies= -1247.248166

Version=EM64L-G03RevE.01\State=1-A\HF=-1247.273403\RMSD=9.107e-10\  
RMSF=1.409e-06 PG=C01 [X(H4O4V1)]\NImag=0\ \@.

(ii) **B2PLYP/6-311++G\*\*//B2PLYP/6-311++G\*\***

Standard orientation:

| Center<br>Number | Atomic<br>Number | Atomic<br>Type | Coordinates (Angstroms) |           |           |
|------------------|------------------|----------------|-------------------------|-----------|-----------|
|                  |                  |                | X                       | Y         | Z         |
| 1                | 8                | 0              | -0.000024               | 1.044213  | -1.300751 |
| 2                | 23               | 0              | -0.000000               | 0.074397  | -0.000001 |
| 3                | 8                | 0              | -1.808400               | -0.905797 | 0.000019  |
| 4                | 8                | 0              | 1.808400                | -0.905797 | -0.000004 |
| 5                | 8                | 0              | 0.000024                | 1.044233  | 1.300736  |
| 6                | 1                | 0              | -2.374368               | -0.981455 | -0.781149 |
| 7                | 1                | 0              | -2.374340               | -0.981507 | 0.781203  |
| 8                | 1                | 0              | 2.374328                | -0.981541 | -0.781194 |
| 9                | 1                | 0              | 2.374380                | -0.981426 | 0.781159  |

Zero-point correction= 0.056567 (Hartree/Particle)  
Thermal correction to Energy= 0.064943  
Thermal correction to Enthalpy= 0.065887  
Thermal correction to Gibbs Free Energy= 0.024040  
Sum of electronic and zero-point Energies= -1246.746840  
Sum of electronic and thermal Energies= -1246.738464  
Sum of electronic and thermal Enthalpies= -1246.737520  
Sum of electronic and thermal Free Energies= -1246.779367

Version=EM64L-G09RevD.01\State=1-A\HF=-1246.3432166\MP2=-1246.8034069\  
RMSD=3.929e-09\RMSF=7.021e-06 PG=C01 [X(H4O4V1)]\NImag=0\ \@.

(iii) NBO-analysis – B3LYP/6-31G\*// B3LYP/6-311++G\*\*

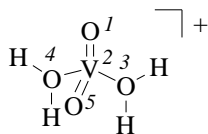

| No. | (Occupancy) | Bond orbital/          | Coefficients/ | Hybrids            |
|-----|-------------|------------------------|---------------|--------------------|
| 1.  | (1.91585)   | <b>BD (1) O 1- V 2</b> |               |                    |
|     | (69.86%)    | 0.8358* O 1 s(9.46%)   | p(90.33%)     | d(0.21%)           |
|     | (30.14%)    | 0.5490* V 2 s(3.95%)   | p(4.73%)      | d(89.79%) f(1.53%) |
| 2.  | (1.87616)   | <b>BD (2) O 1- V 2</b> |               |                    |
|     | (86.12%)    | 0.9280* O 1 s(0.05%)   | p(99.84%)     | d(0.11%)           |
|     | (13.88%)    | 0.3726* V 2 s(0.04%)   | p(27.25%)     | d(66.46%) f(6.24%) |
| 3.  | (1.98614)   | <b>BD (3) O 1- V 2</b> |               |                    |
|     | (72.77%)    | 0.8531* O 1 s(0.00%)   | p(99.87%)     | d(0.13%)           |
|     | (27.23%)    | 0.5218* V 2 s(0.00%)   | p(1.11%)      | d(98.71%) f(0.18%) |
| 4.  | (1.91589)   | <b>BD (1) V 2- O 5</b> |               |                    |
|     | (30.14%)    | 0.5490* V 2 s(3.95%)   | p(4.72%)      | d(89.80%) f(1.53%) |
|     | (69.86%)    | 0.8358* O 5 s(9.46%)   | p(90.33%)     | d(0.21%)           |
| 5.  | (1.87616)   | <b>BD (2) V 2- O 5</b> |               |                    |
|     | (13.88%)    | 0.3726* V 2 s(0.04%)   | p(27.25%)     | d(66.46%) f(6.24%) |
|     | (86.12%)    | 0.9280* O 5 s(0.05%)   | p(99.84%)     | d(0.11%)           |
| 6.  | (1.98614)   | <b>BD (3) V 2- O 5</b> |               |                    |
|     | (27.23%)    | 0.5218* V 2 s(0.00%)   | p(1.11%)      | d(98.71%) f(0.18%) |
|     | (72.77%)    | 0.8531* O 5 s(0.00%)   | p(99.87%)     | d(0.13%)           |
| 24. | (1.97417)   | <b>LP (1) O 1</b>      | s(90.52%)     | p(9.48%) d(0.00%)  |
| 25. | (1.97066)   | <b>LP (1) O 3</b>      | s(8.65%)      | p(91.31%) d(0.03%) |
| 26. | (1.87300)   | <b>LP (2) O 3</b>      | s(41.66%)     | p(58.34%) d(0.00%) |
| 27. | (1.97067)   | <b>LP (1) O 4</b>      | s(8.65%)      | p(91.31%) d(0.03%) |
| 28. | (1.87300)   | <b>LP (2) O 4</b>      | s(41.66%)     | p(58.34%) d(0.00%) |
| 29. | (1.97417)   | <b>LP (1) O 5</b>      | s(90.52%)     | p(9.48%) d(0.00%)  |



Second order perturbation theory analysis of Fock-matrix for *cis*-dioxidovanadium(V) dihydrate acid in NBO-basis(threshold for printing: 0.50 kcal/mol)

| Donor NBO (i)                                 | Acceptor NBO (j)     | kcal/mol | a.u. | a.u.  |
|-----------------------------------------------|----------------------|----------|------|-------|
| within unit 1                                 |                      |          |      |       |
| 24. LP (1) O 1                                | 96. BD*(2) O 1- V 2  | 1.45     | 1.23 | 0.039 |
| 24. LP (1) O 1                                | 99. BD*(2) V 2- O 5  | 4.68     | 1.23 | 0.070 |
| 29. LP (1) O 5                                | 96. BD*(2) O 1- V 2  | 4.68     | 1.23 | 0.070 |
| 29. LP (1) O 5                                | 99. BD*(2) V 2- O 5  | 1.45     | 1.23 | 0.039 |
| from unit 1 to unit 2<br>None above threshold |                      |          |      |       |
| from unit 1 to unit 3<br>None above threshold |                      |          |      |       |
| from unit 2 to unit 1                         |                      |          |      |       |
| 25. LP (1) O 3                                | 95. BD*(1) O 1- V 2  | 0.62     | 0.51 | 0.016 |
| 25. LP (1) O 3                                | 96. BD*(2) O 1- V 2  | 0.54     | 0.68 | 0.018 |
| 25. LP (1) O 3                                | 97. BD*(3) O 1- V 2  | 1.27     | 0.40 | 0.020 |
| 25. LP (1) O 3                                | 98. BD*(1) V 2- O 5  | 0.62     | 0.51 | 0.016 |
| 25. LP (1) O 3                                | 99. BD*(2) V 2- O 5  | 0.54     | 0.68 | 0.018 |
| 25. LP (1) O 3                                | 100. BD*(3) V 2- O 5 | 1.27     | 0.40 | 0.020 |
| 26. LP (2) O 3                                | 95. BD*(1) O 1- V 2  | 1.70     | 0.75 | 0.032 |
| 26. LP (2) O 3                                | 96. BD*(2) O 1- V 2  | 0.12     | 0.91 | 0.010 |
| 26. LP (2) O 3                                | 97. BD*(3) O 1- V 2  | 6.30     | 0.63 | 0.057 |
| 26. LP (2) O 3                                | 98. BD*(1) V 2- O 5  | 1.70     | 0.75 | 0.032 |
| 26. LP (2) O 3                                | 99. BD*(2) V 2- O 5  | 0.13     | 0.91 | 0.010 |
| 26. LP (2) O 3                                | 100. BD*(3) V 2- O 5 | 6.29     | 0.63 | 0.057 |
| within unit 2<br>None above threshold         |                      |          |      |       |
| from unit 2 to unit 3<br>None above threshold |                      |          |      |       |
| from unit 3 to unit 1                         |                      |          |      |       |
| 27. LP (1) O 4                                | 95. BD*(1) O 1- V 2  | 0.62     | 0.51 | 0.016 |
| 27. LP (1) O 4                                | 96. BD*(2) O 1- V 2  | 0.54     | 0.68 | 0.018 |
| 27. LP (1) O 4                                | 97. BD*(3) O 1- V 2  | 1.27     | 0.40 | 0.020 |
| 27. LP (1) O 4                                | 98. BD*(1) V 2- O 5  | 0.62     | 0.51 | 0.016 |
| 27. LP (1) O 4                                | 99. BD*(2) V 2- O 5  | 0.54     | 0.68 | 0.018 |
| 27. LP (1) O 4                                | 100. BD*(3) V 2- O 5 | 1.27     | 0.40 | 0.020 |
| 28. LP (2) O 4                                | 95. BD*(1) O 1- V 2  | 1.70     | 0.75 | 0.032 |
| 28. LP (2) O 4                                | 96. BD*(2) O 1- V 2  | 0.12     | 0.91 | 0.010 |
| 28. LP (2) O 4                                | 97. BD*(3) O 1- V 2  | 6.30     | 0.63 | 0.057 |
| 28. LP (2) O 4                                | 98. BD*(1) V 2- O 5  | 1.70     | 0.75 | 0.032 |
| 28. LP (2) O 4                                | 99. BD*(2) V 2- O 5  | 0.12     | 0.91 | 0.010 |
| 28. LP (2) O 4                                | 100. BD*(3) V 2- O 5 | 6.29     | 0.63 | 0.057 |
| from unit 3 to unit 2<br>None above threshold |                      |          |      |       |
| within unit 3<br>None above threshold         |                      |          |      |       |

| NBO                    | Occupancy | Energy / a.u. |
|------------------------|-----------|---------------|
| Molecular unit 1 (O2V) |           |               |
| 1. BD (1) O 1- V 2     | 1.91585   | -0.71351      |
| 2. BD (2) O 1- V 2     | 1.87616   | -0.48381      |
| 3. BD (3) O 1- V 2     | 1.98614   | -0.54369      |
| 4. BD (1) V 2- O 5     | 1.91589   | -0.71354      |
| 5. BD (2) V 2- O 5     | 1.87616   | -0.48381      |
| 6. BD (3) V 2- O 5     | 1.98614   | -0.54369      |
| Molecular unit 2 (H2O) |           |               |
| Molecular unit 3 (H2O) |           |               |

## 5.2 *cis*-Dioxidovanadium(V) tetrahydrate

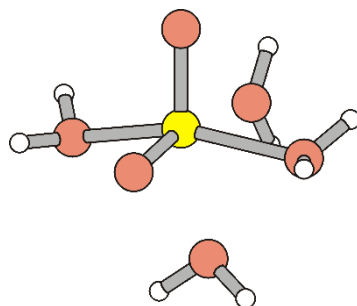

**Figure S5** Calculated minimum structure of *cis*-dioxidovanadium(V) tetrahydrate.

### **B3LYP/6-311++G\*\*//B3LYP/6-311++G\*\***

Standard orientation:

| Center Number | Atomic Number | Atomic Type | Coordinates (Angstroms) |           |           |
|---------------|---------------|-------------|-------------------------|-----------|-----------|
|               |               |             | X                       | Y         | Z         |
| 1             | 8             | 0           | 0.012929                | -1.325915 | -1.264705 |
| 2             | 23            | 0           | 0.002072                | -0.385861 | 0.013552  |
| 3             | 8             | 0           | 0.004029                | -1.325947 | 1.288440  |
| 4             | 8             | 0           | 2.077077                | 0.009112  | -0.116878 |
| 5             | 8             | 0           | -2.074742               | -0.013828 | -0.135938 |
| 6             | 8             | 0           | -0.000192               | 1.611396  | -1.238761 |
| 7             | 8             | 0           | -0.021867               | 1.388838  | 1.420032  |
| 8             | 1             | 0           | -2.546123               | -0.694202 | -0.638831 |
| 9             | 1             | 0           | -2.574634               | 0.143005  | 0.677157  |
| 10            | 1             | 0           | 0.776912                | 1.776165  | -1.788486 |
| 11            | 1             | 0           | -0.767915               | 1.763168  | -1.805187 |
| 12            | 1             | 0           | -0.023057               | 2.319771  | 1.165041  |
| 13            | 1             | 0           | -0.017331               | 1.321549  | 2.382939  |
| 14            | 1             | 0           | 2.556554                | -0.662749 | -0.623598 |
| 15            | 1             | 0           | 2.570064                | 0.158841  | 0.701760  |

Zero-point correction= 0.108240 (Hartree/Particle)  
Thermal correction to Energy= 0.121725  
Thermal correction to Enthalpy= 0.122669  
Thermal correction to Gibbs Free Energy= 0.070280  
Sum of electronic and zero-point Energies= -1400.148786  
Sum of electronic and thermal Energies= -1400.135301  
Sum of electronic and thermal Enthalpies= -1400.134357  
Sum of electronic and thermal Free Energies= -1400.186747

Version=EM64L-G03RevE.01\State=1-A\HF=-1400.2570266\RMSD=7.710e-09\  
RMSF=3.534e-05\PG=C01 [X(H8O6V1)]\NImag=0\ \@.

## 6 Metavanadium Peroxoic Acid and its Conjugate Base

### 6.1 Metavanadium peroxoic acid – *end-on-conformer*

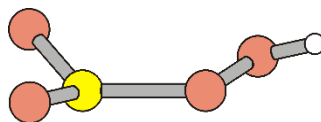

**Figure S6.** Calculated minimum structure of the *end-on-conformer* of metavanadium peroxoic acid.

(i) **B3LYP/6-311++G\*\*//B3LYP/6-311++G\*\***

Standard orientation:

| Center Number | Atomic Number | Atomic Type | Coordinates (Angstroms) |           |           |
|---------------|---------------|-------------|-------------------------|-----------|-----------|
|               |               |             | X                       | Y         | Z         |
| 1             | 8             | 0           | -1.658138               | -1.006897 | 0.218141  |
| 2             | 23            | 0           | -0.483514               | -0.004797 | -0.163018 |
| 3             | 8             | 0           | 1.200629                | -0.676399 | 0.003492  |
| 4             | 8             | 0           | 2.308777                | 0.226638  | 0.039480  |
| 5             | 8             | 0           | -0.834113               | 1.512587  | 0.151800  |
| 6             | 1             | 0           | 2.983578                | -0.337115 | 0.446104  |

Zero-point correction= 0.022997 (Hartree/Particle)  
Thermal correction to Energy= 0.029518  
Thermal correction to Enthalpy= 0.030462  
Thermal correction to Gibbs Free Energy= -0.008186  
Sum of electronic and zero-point Energies= -1245.557398  
Sum of electronic and thermal Energies= -1245.550877  
Sum of electronic and thermal Enthalpies= -1245.549932  
Sum of electronic and thermal Free Energies= -1245.588581

Version=EM64L-G09RevD.01\State=1-A\HF=-1245.5803947\RMSD=3.231e-09\  
RMSF=2.876e-06\PG=C01 [X(H1O4V1)]\NImag=0\@.

(ii) NBO-analysis – B3LYP/6-31G\*// B3LYP/6-311++G\*\*

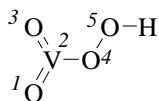

| No. | (Occupancy) | Bond orbital/          | Coefficients/ | Hybrids            |
|-----|-------------|------------------------|---------------|--------------------|
| 1.  | (1.91683)   | <b>BD (1) O 1- V 2</b> |               |                    |
|     | (78.31%)    | 0.8849* O 1 s(3.55%)   | p(96.31%)     | d(0.14%)           |
|     | (21.69%)    | 0.4658* V 2 s(1.96%)   | p(8.66%)      | d(88.21%) f(1.17%) |
| 2.  | (1.88120)   | <b>BD (2) O 1- V 2</b> |               |                    |
|     | (74.41%)    | 0.8626* O 1 s(4.81%)   | p(95.02%)     | d(0.17%)           |
|     | (25.59%)    | 0.5058* V 2 s(4.08%)   | p(20.70%)     | d(74.58%) f(0.65%) |
| 3.  | (1.92071)   | <b>BD (1) V 2- O 3</b> |               |                    |
|     | (19.37%)    | 0.4401* V 2 s(1.89%)   | p(22.50%)     | d(74.25%) f(1.36%) |
|     | (80.63%)    | 0.8979* O 3 s(0.78%)   | p(99.11%)     | d(0.11%)           |
| 4.  | (1.87618)   | <b>BD (2) V 2- O 3</b> |               |                    |
|     | (23.41%)    | 0.4838* V 2 s(17.34%)  | p(13.10%)     | d(68.67%) f(0.88%) |
|     | (76.59%)    | 0.8752* O 3 s(6.45%)   | p(93.38%)     | d(0.17%)           |
| 5.  | (1.87365)   | <b>BD (3) V 2- O 3</b> |               |                    |
|     | (18.16%)    | 0.4262* V 2 s(5.00%)   | p(17.92%)     | d(74.93%) f(2.15%) |
|     | (81.84%)    | 0.9046* O 3 s(1.24%)   | p(98.63%)     | d(0.12%)           |
| 6.  | (1.93607)   | <b>BD (1) V 2- O 4</b> |               |                    |
|     | (10.54%)    | 0.3247* V 2 s(5.15%)   | p(34.05%)     | d(60.14%) f(0.65%) |
|     | (89.46%)    | 0.9458* O 4 s(1.21%)   | p(98.74%)     | d(0.05%)           |
| 7.  | (1.95122)   | <b>BD (2) V 2- O 4</b> |               |                    |
|     | (11.04%)    | 0.3323* V 2 s(22.38%)  | p(11.49%)     | d(65.00%) f(1.13%) |
|     | (88.96%)    | 0.9432* O 4 s(13.45%)  | p(86.48%)     | d(0.07%)           |
| 8.  | (1.98882)   | <b>BD (1) O 4- O 5</b> |               |                    |
|     | (50.82%)    | 0.7129* O 4 s(14.19%)  | p(85.65%)     | d(0.16%)           |
|     | (49.18%)    | 0.7013* O 5 s(11.91%)  | p(87.82%)     | d(0.26%)           |
| 23. | (1.97673)   | <b>LP (1) O 1</b>      | s(91.54%)     | p(8.46%) d(0.00%)  |
| 24. | (1.66110)   | <b>LP (2) O 1</b>      | s(0.10%)      | p(99.80%) d(0.10%) |
| 25. | (1.97558)   | <b>LP (1) O 3</b>      | s(91.52%)     | p(8.48%) d(0.00%)  |
| 26. | (1.97878)   | <b>LP (1) O 4</b>      | s(71.44%)     | p(28.53%) d(0.02%) |
| 27. | (1.99474)   | <b>LP (1) O 5</b>      | s(65.69%)     | p(34.28%) d(0.04%) |
| 28. | (1.96041)   | <b>LP (2) O 5</b>      | s(0.24%)      | p(99.66%) d(0.10%) |

Second order perturbation theory analysis of Fock-matrix for the end-on-conformer of metavanadium peroxy acid in NBO-basis(threshold for printing: 0.50 kcal/mol)

| Donor NBO (i)  | Acceptor NBO (j)    | kcal/mol | a.u. | a.u.  |
|----------------|---------------------|----------|------|-------|
| 23. LP (1) O 1 | 92. BD*(1) V 2- O 3 | 2.68     | 1.04 | 0.049 |
| 23. LP (1) O 1 | 93. BD*(2) V 2- O 3 | 1.59     | 1.11 | 0.039 |
| 23. LP (1) O 1 | 94. BD*(3) V 2- O 3 | 7.54     | 1.04 | 0.082 |
| 23. LP (1) O 1 | 96. BD*(2) V 2- O 4 | 6.43     | 1.08 | 0.079 |
| 24. LP (2) O 1 | 90. BD*(1) O 1- V 2 | 3.06     | 0.27 | 0.027 |
| 24. LP (2) O 1 | 92. BD*(1) V 2- O 3 | 9.49     | 0.32 | 0.052 |
| 24. LP (2) O 1 | 93. BD*(2) V 2- O 3 | 8.95     | 0.39 | 0.056 |
| 24. LP (2) O 1 | 94. BD*(3) V 2- O 3 | 3.69     | 0.33 | 0.033 |
| 24. LP (2) O 1 | 96. BD*(2) V 2- O 4 | 28.00    | 0.36 | 0.093 |
| 25. LP (1) O 3 | 93. BD*(2) V 2- O 3 | 2.07     | 1.11 | 0.044 |
| 25. LP (1) O 3 | 96. BD*(2) V 2- O 4 | 2.09     | 1.08 | 0.045 |
| 26. LP (1) O 4 | 90. BD*(1) O 1- V 2 | 0.58     | 0.77 | 0.019 |
| 26. LP (1) O 4 | 93. BD*(2) V 2- O 3 | 0.78     | 0.89 | 0.024 |
| 26. LP (1) O 4 | 94. BD*(3) V 2- O 3 | 3.40     | 0.83 | 0.049 |
| 26. LP (1) O 4 | 95. BD*(1) V 2- O 4 | 0.56     | 0.80 | 0.020 |
| 28. LP (2) O 5 | 95. BD*(1) V 2- O 4 | 3.10     | 0.36 | 0.031 |

Natural bond orbital (NBO)-energies

| NBO                 | Occupancy | Energy / a.u. |
|---------------------|-----------|---------------|
| 1. BD (1) O 1- V 2  | 1.91683   | -0.40701      |
| 2. BD (2) O 1- V 2  | 1.88120   | -0.43966      |
| 3. BD (1) V 2- O 3  | 1.92071   | -0.35896      |
| 4. BD (2) V 2- O 3  | 1.87618   | -0.47526      |
| 5. BD (3) V 2- O 3  | 1.87365   | -0.35506      |
| 6. BD (1) V 2- O 4  | 1.93607   | -0.37775      |
| 7. BD (2) V 2- O 4  | 1.95122   | -0.53369      |
| 8. BD (1) O 4- O 5  | 1.98882   | -0.78748      |
| 97. BD*(1) O 4- O 5 | 0.01578   | 0.07528       |

## 6.2 Metavanadium peroxy acid – *side-on-conformer*

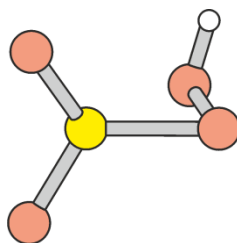

**Figure S7.** Calculated minimum structure of the *side-on-conformer* of metavanadium peroxy acid.

### (i) B3LYP/6-311++G\*\*//B3LYP/6-311++G\*\*

Standard orientation:

| Center Number | Atomic Number | Atomic Type | Coordinates (Angstroms) |           |           |
|---------------|---------------|-------------|-------------------------|-----------|-----------|
|               |               |             | X                       | Y         | Z         |
| 1             | 23            | 0           | -0.310860               | -0.006668 | -0.015557 |
| 2             | 8             | 0           | -1.049253               | 1.398843  | 0.060069  |
| 3             | 8             | 0           | 1.388137                | -0.209705 | 0.812963  |
| 4             | 8             | 0           | 1.623300                | -0.049098 | -0.637394 |
| 5             | 8             | 0           | -1.327240               | -1.222392 | -0.103175 |
| 6             | 1             | 0           | 2.070227                | 0.812170  | -0.701900 |

Zero-point correction= 0.023988 (Hartree/Particle)  
Thermal correction to Energy= 0.029717  
Thermal correction to Enthalpy= 0.030661  
Thermal correction to Gibbs Free Energy= -0.005874  
Sum of electronic and zero-point Energies= -1245.570244  
Sum of electronic and thermal Energies= -1245.564515  
Sum of electronic and thermal Enthalpies= -1245.563570  
Sum of electronic and thermal Free Energies= -1245.600106

Version=AM64L-G03RevE.01\State=1-A\HF=-1245.5942316\RMSD=7.995e-09\RMSF=7.547e-07\PG=C01 [X(H1O4V1)]\@.

(ii) NBO-analysis – B3LYP/6-31G\*// B3LYP/6-311++G\*\*

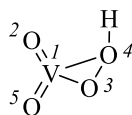

| No. | (Occupancy) | Bond orbital/          | Coefficients/ | Hybrids            |
|-----|-------------|------------------------|---------------|--------------------|
| 1.  | (1.97244)   | <b>BD (1) V 1- O 2</b> |               |                    |
|     | (30.49%)    | 0.5522* V 1 s(1.48%)   | p(0.32%)      | d(98.08%) f(0.11%) |
|     | (69.51%)    | 0.8337* O 2 s(6.74%)   | p(93.06%)     | d(0.20%)           |
| 2.  | (1.92555)   | <b>BD (2) V 1- O 2</b> |               |                    |
|     | (22.00%)    | 0.4690* V 1 s(3.42%)   | p(19.25%)     | d(76.78%) f(0.55%) |
|     | (78.00%)    | 0.8832* O 2 s(0.33%)   | p(99.55%)     | d(0.12%)           |
| 3.  | (1.92810)   | <b>BD (1) V 1- O 3</b> |               |                    |
|     | (12.96%)    | 0.3600* V 1 s(20.35%)  | p(20.26%)     | d(58.70%) f(0.69%) |
|     | (87.04%)    | 0.9329* O 3 s(6.73%)   | p(93.14%)     | d(0.13%)           |
| 4.  | (1.97773)   | <b>BD (1) V 1- O 5</b> |               |                    |
|     | (31.68%)    | 0.5628* V 1 s(2.45%)   | p(0.47%)      | d(96.93%) f(0.14%) |
|     | (68.32%)    | 0.8266* O 5 s(7.57%)   | p(92.22%)     | d(0.21%)           |
| 5.  | (1.98682)   | <b>BD (2) V 1- O 5</b> |               |                    |
|     | (19.86%)    | 0.4457* V 1 s(1.24%)   | p(1.71%)      | d(96.80%) f(0.25%) |
|     | (80.14%)    | 0.8952* O 5 s(0.84%)   | p(99.06%)     | d(0.10%)           |
| 6.  | (1.89080)   | <b>BD (3) V 1- O 5</b> |               |                    |
|     | (17.90%)    | 0.4231* V 1 s(7.85%)   | p(26.16%)     | d(65.10%) f(0.90%) |
|     | (82.10%)    | 0.9061* O 5 s(0.03%)   | p(99.86%)     | d(0.11%)           |
| 7.  | (1.97755)   | <b>BD (1) O 3- O 4</b> |               |                    |
|     | (41.57%)    | 0.6448* O 3 s(6.19%)   | p(93.52%)     | d(0.30%)           |
|     | (58.43%)    | 0.7644* O 4 s(12.73%)  | p(87.06%)     | d(0.21%)           |
| 22. | (1.97116)   | <b>LP (1) O 2</b>      | s(91.28%)     | p(8.72%) d(0.00%)  |
| 23. | (1.69672)   | <b>LP (2) O 2</b>      | s(1.64%)      | p(98.26%) d(0.10%) |
| 24. | (1.98593)   | <b>LP (1) O 3</b>      | s(87.21%)     | p(12.78%) d(0.01%) |
| 25. | (1.93867)   | <b>LP (2) O 3</b>      | s(0.10%)      | p(99.82%) d(0.08%) |
| 26. | (1.99022)   | <b>LP (1) O 4</b>      | s(53.75%)     | p(46.19%) d(0.06%) |
| 27. | (1.84928)   | <b>LP (2) O 4</b>      | s(10.78%)     | p(89.14%) d(0.08%) |
| 28. | (1.97008)   | <b>LP (1) O 5</b>      | s(91.55%)     | p(8.44%) d(0.00%)  |



Second order perturbation theory analysis of Fock-matrix for the *side-on*-conformer of metavanadium peroxy acid in NBO-basis(threshold for printing: 0.50 kcal/mol)

| Donor NBO (i)  | Acceptor NBO (j)    | kcal/mol | a.u. | a.u.  |
|----------------|---------------------|----------|------|-------|
| 22. LP (1) O 2 | 92. BD*(2) V 1- O 2 | 0.83     | 1.00 | 0.026 |
| 22. LP (1) O 2 | 93. BD*(1) V 1- O 3 | 3.21     | 1.09 | 0.055 |
| 22. LP (1) O 2 | 95. BD*(2) V 1- O 5 | 5.35     | 0.95 | 0.068 |
| 22. LP (1) O 2 | 96. BD*(3) V 1- O 5 | 4.73     | 1.05 | 0.065 |
| 23. LP (2) O 2 | 93. BD*(1) V 1- O 3 | 3.70     | 0.39 | 0.035 |
| 23. LP (2) O 2 | 94. BD*(1) V 1- O 5 | 4.32     | 0.29 | 0.034 |
| 23. LP (2) O 2 | 95. BD*(2) V 1- O 5 | 62.25    | 0.25 | 0.112 |
| 23. LP (2) O 2 | 96. BD*(3) V 1- O 5 | 6.88     | 0.35 | 0.046 |
| 25. LP (2) O 3 | 91. BD*(1) V 1- O 2 | 6.26     | 0.31 | 0.039 |
| 25. LP (2) O 3 | 92. BD*(2) V 1- O 2 | 1.60     | 0.33 | 0.021 |
| 25. LP (2) O 3 | 94. BD*(1) V 1- O 5 | 4.62     | 0.32 | 0.035 |
| 25. LP (2) O 3 | 95. BD*(2) V 1- O 5 | 0.52     | 0.28 | 0.011 |
| 25. LP (2) O 3 | 96. BD*(3) V 1- O 5 | 1.07     | 0.37 | 0.018 |
| 25. LP (2) O 3 | 98. BD*(1) O 4- H 6 | 1.17     | 0.71 | 0.026 |
| 26. LP (1) O 4 | 91. BD*(1) V 1- O 2 | 1.27     | 0.69 | 0.027 |
| 26. LP (1) O 4 | 92. BD*(2) V 1- O 2 | 1.29     | 0.72 | 0.028 |
| 26. LP (1) O 4 | 95. BD*(2) V 1- O 5 | 0.58     | 0.67 | 0.019 |
| 27. LP (2) O 4 | 91. BD*(1) V 1- O 2 | 0.53     | 0.47 | 0.014 |
| 27. LP (2) O 4 | 92. BD*(2) V 1- O 2 | 5.81     | 0.50 | 0.049 |
| 27. LP (2) O 4 | 93. BD*(1) V 1- O 3 | 1.99     | 0.59 | 0.031 |
| 27. LP (2) O 4 | 94. BD*(1) V 1- O 5 | 2.61     | 0.49 | 0.032 |
| 27. LP (2) O 4 | 95. BD*(2) V 1- O 5 | 12.55    | 0.45 | 0.069 |
| 27. LP (2) O 4 | 96. BD*(3) V 1- O 5 | 1.29     | 0.54 | 0.024 |
| 28. LP (1) O 5 | 91. BD*(1) V 1- O 2 | 0.52     | 0.98 | 0.020 |
| 28. LP (1) O 5 | 93. BD*(1) V 1- O 3 | 2.87     | 1.09 | 0.052 |
| 28. LP (1) O 5 | 96. BD*(3) V 1- O 5 | 0.83     | 1.05 | 0.027 |

Natural bond orbital (NBO)-energies

| NBO                 | Occupancy | Energy / a.u. |
|---------------------|-----------|---------------|
| 1. BD (1) V 1- O 2  | 1.97244   | -0.52019      |
| 2. BD (2) V 1- O 2  | 1.92555   | -0.35134      |
| 3. BD (1) V 1- O 3  | 1.92810   | -0.46638      |
| 4. BD (1) V 1- O 5  | 1.97773   | -0.53921      |
| 5. BD (2) V 1- O 5  | 1.98682   | -0.37863      |
| 6. BD (3) V 1- O 5  | 1.89080   | -0.33391      |
| 7. BD (1) O 3- O 4  | 1.97755   | -0.75641      |
| 97. BD*(1) O 3- O 4 | 0.00416   | 0.00082       |

### 6.3 *iso*-Metavanadium peroxy acid

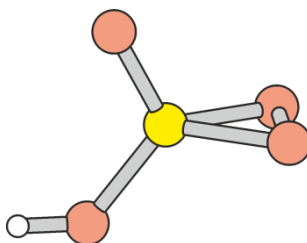

**Figure S8.** Calculated minimum structure of the *iso*-metavanadium peroxy acid.

**(i) B3LYP/6-311++G\*\*//B3LYP/6-311++G\*\***

Standard orientation:

| Center Number | Atomic Number | Atomic Type | Coordinates (Angstroms) |           |           |
|---------------|---------------|-------------|-------------------------|-----------|-----------|
|               |               |             | X                       | Y         | Z         |
| 1             | 23            | 0           | -0.157616               | 0.080495  | -0.000012 |
| 2             | 8             | 0           | -0.575749               | 1.596072  | 0.000000  |
| 3             | 8             | 0           | 1.424671                | -0.325595 | 0.726490  |
| 4             | 8             | 0           | 1.424691                | -0.325628 | -0.726468 |
| 5             | 8             | 0           | -1.513275               | -1.067005 | 0.000013  |
| 6             | 1             | 0           | -2.457529               | -0.874132 | 0.000001  |

Zero-point correction= 0.022505 (Hartree/Particle)  
Thermal correction to Energy= 0.028358  
Thermal correction to Enthalpy= 0.029303  
Thermal correction to Gibbs Free Energy= -0.007133  
Sum of electronic and zero-point Energies= -1245.596667  
Sum of electronic and thermal Energies= -1245.590814  
Sum of electronic and thermal Enthalpies= -1245.589870  
Sum of electronic and thermal Free Energies= -1245.626305

Version=AM64L-G03RevE.01\State=1-A\HF=-1245.6191724\RMSD=4.475e-09\RMSF=2.397e-06\PG=C01 [X(H1O4V1)]\@\.

(ii) NBO-analysis – B3LYP/6-31G\*// B3LYP/6-311++G\*\*

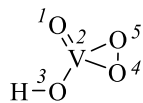

| No. | (Occupancy) | Bond orbital/          | Coefficients/ | Hybrids            |
|-----|-------------|------------------------|---------------|--------------------|
| 1.  | (1.96961)   | <b>BD (1) O 1- V 2</b> |               |                    |
|     | (68.76%)    | 0.8292* O 1 s(8.83%)   | p(90.94%)     | d(0.23%)           |
|     | (31.24%)    | 0.5590* V 2 s(4.64%)   | p(0.36%)      | d(94.85%) f(0.16%) |
| 2.  | (1.91529)   | <b>BD (2) O 1- V 2</b> |               |                    |
|     | (81.67%)    | 0.9037* O 1 s(0.21%)   | p(99.68%)     | d(0.11%)           |
|     | (18.33%)    | 0.4281* V 2 s(9.64%)   | p(8.54%)      | d(81.16%) f(0.67%) |
| 3.  | (1.98330)   | <b>BD (3) O 1- V 2</b> |               |                    |
|     | (76.66%)    | 0.8755* O 1 s(0.00%)   | p(99.88%)     | d(0.12%)           |
|     | (23.34%)    | 0.4831* V 2 s(0.00%)   | p(2.36%)      | d(97.45%) f(0.19%) |
| 4.  | (1.96572)   | <b>BD (1) V 2- O 3</b> |               |                    |
|     | (16.09%)    | 0.4011* V 2 s(2.64%)   | p(3.23%)      | d(93.99%) f(0.13%) |
|     | (83.91%)    | 0.9160* O 3 s(15.41%)  | p(84.52%)     | d(0.07%)           |
| 5.  | (1.84650)   | <b>BD (1) V 2- O 4</b> |               |                    |
|     | (19.13%)    | 0.4373* V 2 s(33.50%)  | p(5.72%)      | d(60.35%) f(0.43%) |
|     | (80.87%)    | 0.8993* O 4 s(6.81%)   | p(93.01%)     | d(0.18%)           |
| 6.  | (1.84650)   | <b>BD (1) V 2- O 5</b> |               |                    |
|     | (19.12%)    | 0.4373* V 2 s(33.50%)  | p(5.72%)      | d(60.34%) f(0.43%) |
|     | (80.88%)    | 0.8993* O 5 s(6.81%)   | p(93.01%)     | d(0.18%)           |
| 7.  | (1.98495)   | <b>BD (1) O 3- H 6</b> |               |                    |
|     | (75.57%)    | 0.8693* O 3 s(26.98%)  | p(72.89%)     | d(0.13%)           |
|     | (24.43%)    | 0.4942* H 6 s(100.00%) |               |                    |
| 8.  | (1.93976)   | <b>BD (1) O 4- O 5</b> |               |                    |
|     | (50.00%)    | 0.7071* O 4 s(6.36%)   | p(93.33%)     | d(0.31%)           |
|     | (50.00%)    | 0.7071* O 5 s(6.36%)   | p(93.33%)     | d(0.31%)           |
| 22. | (1.97008)   | <b>LP (1) O 1</b>      | s(90.95%)     | p(9.05%) d(0.00%)  |
| 23. | (1.94765)   | <b>LP (1) O 3</b>      | s(57.65%)     | p(42.29%) d(0.06%) |
| 24. | (1.80872)   | <b>LP (2) O 3</b>      | s(0.00%)      | p(99.94%) d(0.06%) |
| 25. | (1.97705)   | <b>LP (1) O 4</b>      | s(86.54%)     | p(13.46%) d(0.01%) |
| 26. | (1.86005)   | <b>LP (2) O 4</b>      | s(0.47%)      | p(99.44%) d(0.09%) |
| 27. | (1.97705)   | <b>LP (1) O 5</b>      | s(86.54%)     | p(13.46%) d(0.01%) |
| 28. | (1.86006)   | <b>LP (2) O 5</b>      | s(0.47%)      | p(99.44%) d(0.09%) |
| 98. | (0.04142)   | <b>BD*(1) O 4- O 5</b> |               |                    |
|     | (50.00%)    | 0.7071* O 4 s(6.36%)   | p(93.33%)     | d(0.31%)           |
|     | (50.00%)    | -0.7071* O 5 s(6.36%)  | p(93.33%)     | d(0.31%)           |

Second order perturbation theory analysis of Fock-matrix for *iso*-metavanadium peroxy acid in NBO-basis(threshold for printing: 0.50 kcal/mol)

| Donor NBO (i)  | Acceptor NBO (j)    | kcal/mol | a.u. | a.u.  |
|----------------|---------------------|----------|------|-------|
| 22. LP (1) O 1 | 92. BD*(2) O 1- V 2 | 3.25     | 1.04 | 0.054 |
| 22. LP (1) O 1 | 95. BD*(1) V 2- O 4 | 4.69     | 1.11 | 0.067 |
| 22. LP (1) O 1 | 96. BD*(1) V 2- O 5 | 4.69     | 1.11 | 0.067 |
| 23. LP (1) O 3 | 91. BD*(1) O 1- V 2 | 1.76     | 0.69 | 0.031 |
| 23. LP (1) O 3 | 92. BD*(2) O 1- V 2 | 17.09    | 0.70 | 0.101 |
| 23. LP (1) O 3 | 95. BD*(1) V 2- O 4 | 1.65     | 0.77 | 0.033 |
| 23. LP (1) O 3 | 96. BD*(1) V 2- O 5 | 1.65     | 0.77 | 0.033 |
| 24. LP (2) O 3 | 93. BD*(3) O 1- V 2 | 9.04     | 0.25 | 0.043 |
| 24. LP (2) O 3 | 95. BD*(1) V 2- O 4 | 5.35     | 0.41 | 0.042 |
| 24. LP (2) O 3 | 96. BD*(1) V 2- O 5 | 5.35     | 0.41 | 0.042 |
| 25. LP (1) O 4 | 93. BD*(3) O 1- V 2 | 0.56     | 0.81 | 0.020 |
| 25. LP (1) O 4 | 94. BD*(1) V 2- O 3 | 1.52     | 0.85 | 0.033 |
| 25. LP (1) O 4 | 95. BD*(1) V 2- O 4 | 1.22     | 0.97 | 0.032 |
| 25. LP (1) O 4 | 98. BD*(1) O 4- O 5 | 0.62     | 0.95 | 0.022 |
| 26. LP (2) O 4 | 91. BD*(1) O 1- V 2 | 8.49     | 0.33 | 0.048 |
| 26. LP (2) O 4 | 92. BD*(2) O 1- V 2 | 0.84     | 0.34 | 0.015 |
| 26. LP (2) O 4 | 93. BD*(3) O 1- V 2 | 6.78     | 0.24 | 0.037 |
| 26. LP (2) O 4 | 94. BD*(1) V 2- O 3 | 7.82     | 0.29 | 0.043 |
| 27. LP (1) O 5 | 93. BD*(3) O 1- V 2 | 0.56     | 0.81 | 0.020 |
| 27. LP (1) O 5 | 94. BD*(1) V 2- O 3 | 1.52     | 0.85 | 0.033 |
| 27. LP (1) O 5 | 96. BD*(1) V 2- O 5 | 1.22     | 0.97 | 0.032 |
| 27. LP (1) O 5 | 98. BD*(1) O 4- O 5 | 0.62     | 0.95 | 0.022 |
| 28. LP (2) O 5 | 91. BD*(1) O 1- V 2 | 8.49     | 0.33 | 0.048 |
| 28. LP (2) O 5 | 92. BD*(2) O 1- V 2 | 0.84     | 0.34 | 0.015 |
| 28. LP (2) O 5 | 93. BD*(3) O 1- V 2 | 6.78     | 0.24 | 0.037 |
| 28. LP (2) O 5 | 94. BD*(1) V 2- O 3 | 7.82     | 0.29 | 0.043 |

Natural bond orbital (NBO)-energies

| NBO                 | Occupancy | Energy / a.u. |
|---------------------|-----------|---------------|
| 1. BD (1) O 1- V 2  | 1.96961   | -0.58755      |
| 2. BD (2) O 1- V 2  | 1.91529   | -0.37318      |
| 3. BD (3) O 1- V 2  | 1.98330   | -0.39109      |
| 4. BD (1) V 2- O 3  | 1.96572   | -0.56766      |
| 5. BD (1) V 2- O 4  | 1.84650   | -0.47849      |
| 6. BD (1) V 2- O 5  | 1.84650   | -0.47848      |
| 7. BD (1) O 3- H 6  | 1.98495   | -0.79730      |
| 8. BD (1) O 4- O 5  | 1.93976   | -0.66900      |
| 98. BD*(1) O 4- O 5 | 0.04142   | 0.03991       |

## 6.4 Metavanadium peroxy acid conjugate base

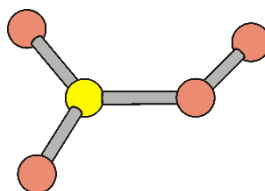

**Figure S9.** Calculated minimum structure of metavanadium peroxy acid conjugate base.

**(i) B3LYP/6-311++G\*\*//B3LYP/6-311++G\*\***

Standard orientation:

| Center Number | Atomic Number | Atomic Type | Coordinates (Angstroms) |           |           |
|---------------|---------------|-------------|-------------------------|-----------|-----------|
|               |               |             | X                       | Y         | Z         |
| 1             | 8             | 0           | -1.597798               | -1.121079 | 0.000068  |
| 2             | 23            | 0           | -0.415339               | 0.007673  | -0.000142 |
| 3             | 8             | 0           | 1.229243                | -0.595703 | 0.000287  |
| 4             | 8             | 0           | 2.399356                | 0.113762  | -0.000114 |
| 5             | 8             | 0           | -0.836700               | 1.580961  | 0.000166  |

Zero-point correction= 0.010677 (Hartree/Particle)  
Thermal correction to Energy= 0.016580  
Thermal correction to Enthalpy= 0.017524  
Thermal correction to Gibbs Free Energy= -0.019742  
Sum of electronic and zero-point Energies= -1245.032407  
Sum of electronic and thermal Energies= -1245.026504  
Sum of electronic and thermal Enthalpies= -1245.025560  
Sum of electronic and thermal Free Energies= -1245.062826

Version=EM64L-G09RevD.01\State=1-A\HF=-1245.0430835\RMSD=1.471e-09\  
RMSF=4.054e-06\PG=C01 [X(O4V1)]\NImag=0\@.

(ii) NBO-analysis – B3LYP/6-31G\*// B3LYP/6-311++G\*\*

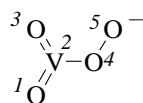

| No. | (Occupancy) | Bond orbital/          | Coefficients/ | Hybrids            |
|-----|-------------|------------------------|---------------|--------------------|
| 1.  | (1.94008)   | <b>BD (1) O 1- V 2</b> |               |                    |
|     | (80.34%)    | 0.8963* O 1 s(0.00%)   | p(99.91%)     | d(0.09%)           |
|     | (19.66%)    | 0.4434* V 2 s(0.00%)   | p(31.39%)     | d(68.30%) f(0.31%) |
| 2.  | (1.99099)   | <b>BD (2) O 1- V 2</b> |               |                    |
|     | (72.46%)    | 0.8512* O 1 s(9.49%)   | p(90.36%)     | d(0.15%)           |
|     | (27.54%)    | 0.5248* V 2 s(2.69%)   | p(0.55%)      | d(96.63%) f(0.13%) |
| 3.  | (1.93125)   | <b>BD (1) V 2- O 3</b> |               |                    |
|     | (18.43%)    | 0.4293* V 2 s(0.00%)   | p(35.32%)     | d(64.30%) f(0.38%) |
|     | (81.57%)    | 0.9032* O 3 s(0.00%)   | p(99.91%)     | d(0.09%)           |
| 4.  | (1.99046)   | <b>BD (2) V 2- O 3</b> |               |                    |
|     | (28.10%)    | 0.5301* V 2 s(2.31%)   | p(0.49%)      | d(97.07%) f(0.14%) |
|     | (71.90%)    | 0.8479* O 3 s(8.78%)   | p(91.07%)     | d(0.15%)           |
| 5.  | (1.94164)   | <b>BD (1) V 2- O 4</b> |               |                    |
|     | (15.60%)    | 0.3950* V 2 s(0.00%)   | p(32.52%)     | d(67.19%) f(0.30%) |
|     | (84.40%)    | 0.9187* O 4 s(0.00%)   | p(99.95%)     | d(0.05%)           |
| 6.  | (1.99145)   | <b>BD (2) V 2- O 4</b> |               |                    |
|     | (19.77%)    | 0.4446* V 2 s(1.10%)   | p(0.29%)      | d(98.47%) f(0.13%) |
|     | (80.23%)    | 0.8957* O 4 s(9.83%)   | p(90.09%)     | d(0.08%)           |
| 7.  | (1.98178)   | <b>BD (1) O 4- O 5</b> |               |                    |
|     | (58.49%)    | 0.7648* O 4 s(20.10%)  | p(79.77%)     | d(0.13%)           |
|     | (41.51%)    | 0.6443* O 5 s(11.15%)  | p(88.54%)     | d(0.31%)           |
| 21. | (1.97648)   | <b>LP (1) O 1</b>      | s(90.46%)     | p(9.54%) d(0.00%)  |
| 22. | (1.77910)   | <b>LP (2) O 1</b>      | s(0.03%)      | p(99.90%) d(0.06%) |
| 23. | (1.97340)   | <b>LP (1) O 3</b>      | s(90.98%)     | p(9.02%) d(0.00%)  |
| 24. | (1.76586)   | <b>LP (2) O 3</b>      | s(0.23%)      | p(99.70%) d(0.07%) |
| 25. | (1.94575)   | <b>LP (1) O 4</b>      | s(70.33%)     | p(29.65%) d(0.02%) |
| 26. | (1.99302)   | <b>LP (1) O 5</b>      | s(89.51%)     | p(10.49%) d(0.00%) |
| 27. | (1.81985)   | <b>LP (2) O 5</b>      | s(0.00%)      | p(99.95%) d(0.05%) |
| 28. | (1.81552)   | <b>LP (3) O 5</b>      | s(0.03%)      | p(99.93%) d(0.04%) |

Second order perturbation theory analysis of Fock-matrix for  
metavanadium peroxy acid conjugate base in NBO-basis(threshold for  
printing: 0.50 kcal/mol)

| Donor NBO (i)  | Acceptor NBO (j)    | kcal/mol | a.u. | a.u.  |
|----------------|---------------------|----------|------|-------|
| 22. LP (2) O 1 | 91. BD*(2) O 1- V 2 | 0.83     | 0.27 | 0.014 |
| 22. LP (2) O 1 | 93. BD*(2) V 2- O 3 | 23.45    | 0.28 | 0.074 |
| 22. LP (2) O 1 | 95. BD*(2) V 2- O 4 | 35.15    | 0.24 | 0.083 |
| 24. LP (2) O 3 | 91. BD*(2) O 1- V 2 | 30.91    | 0.28 | 0.084 |
| 24. LP (2) O 3 | 95. BD*(2) V 2- O 4 | 30.51    | 0.24 | 0.078 |
| 25. LP (1) O 4 | 91. BD*(2) O 1- V 2 | 1.81     | 0.79 | 0.035 |
| 25. LP (1) O 4 | 93. BD*(2) V 2- O 3 | 4.86     | 0.79 | 0.057 |
| 27. LP (2) O 5 | 94. BD*(1) V 2- O 4 | 16.34    | 0.19 | 0.050 |
| 28. LP (3) O 5 | 95. BD*(2) V 2- O 4 | 13.42    | 0.21 | 0.049 |

Natural bond orbital (NBO)-energies

| NBO                 | Occupancy | Energy / a.u. |
|---------------------|-----------|---------------|
| 1. BD (1) O 1- V 2  | 1.94008   | -0.13369      |
| 2. BD (2) O 1- V 2  | 1.99099   | -0.32951      |
| 3. BD (1) V 2- O 3  | 1.93125   | -0.13380      |
| 4. BD (2) V 2- O 3  | 1.99046   | -0.32447      |
| 5. BD (1) V 2- O 4  | 1.94164   | -0.16673      |
| 6. BD (2) V 2- O 4  | 1.99145   | -0.32494      |
| 7. BD (1) O 4- O 5  | 1.98178   | -0.60774      |
| 96. BD*(1) O 4- O 5 | 0.01288   | 0.40574       |

## 6.5 *iso*-Metavanadium peroxy acid conjugate base

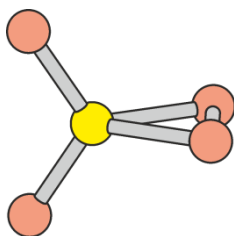

**Figure S10.** Calculated minimum structure of *iso*-metavanadium peroxy acid conjugate base.

### (i) B3LYP/6-311++G\*\*//B3LYP/6-311++G\*\*

Standard orientation:

| Center Number | Atomic Number | Atomic Type | Coordinates (Angstroms) |           |           |
|---------------|---------------|-------------|-------------------------|-----------|-----------|
|               |               |             | X                       | Y         | Z         |
| 1             | 23            | 0           | -0.232429               | -0.000004 | -0.000001 |
| 2             | 8             | 0           | -1.120797               | -1.364629 | 0.000001  |
| 3             | 8             | 0           | 1.454892                | -0.000010 | -0.741514 |
| 4             | 8             | 0           | 1.454892                | -0.000009 | 0.741515  |
| 5             | 8             | 0           | -1.120753               | 1.364659  | 0.000001  |

```

Zero-point correction=                0.011594 (Hartree/Particle)
Thermal correction to Energy=         0.016816
Thermal correction to Enthalpy=       0.017760
Thermal correction to Gibbs Free Energy= -0.017492
Sum of electronic and zero-point Energies= -1245.094509
Sum of electronic and thermal Energies= -1245.089287
Sum of electronic and thermal Enthalpies= -1245.088343
Sum of electronic and thermal Free Energies= -1245.123595

```

```

Version=AM64L-G03RevE.01\State=1-A\HF=-1245.1061032\RMSD=5.110e-
09\RMSF=3.836e-06\PG=C01 [X(O4V1)]\ \@.

```



(ii) NBO-analysis – B3LYP/6-31G\*// B3LYP/6-311++G\*\*

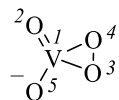

| No. | (Occupancy) | Bond orbital/          | Coefficients/ | Hybrids            |
|-----|-------------|------------------------|---------------|--------------------|
| 1.  | (1.96453)   | <b>BD (1) V 1- O 2</b> |               |                    |
|     | (26.48%)    | 0.5146* V 1 s(1.06%)   | p(0.73%)      | d(98.11%) f(0.10%) |
|     | (73.52%)    | 0.8574* O 2 s(8.50%)   | p(91.33%)     | d(0.17%)           |
| 2.  | (1.91422)   | <b>BD (2) V 1- O 2</b> |               |                    |
|     | (17.19%)    | 0.4146* V 1 s(0.00%)   | p(37.88%)     | d(61.65%) f(0.48%) |
|     | (82.81%)    | 0.9100* O 2 s(0.00%)   | p(99.92%)     | d(0.08%)           |
| 3.  | (1.87527)   | <b>BD (1) V 1- O 3</b> |               |                    |
|     | (14.61%)    | 0.3822* V 1 s(36.53%)  | p(13.23%)     | d(49.80%) f(0.45%) |
|     | (85.39%)    | 0.9241* O 3 s(7.84%)   | p(92.04%)     | d(0.12%)           |
| 4.  | (1.87527)   | <b>BD (1) V 1- O 4</b> |               |                    |
|     | (14.61%)    | 0.3822* V 1 s(36.53%)  | p(13.23%)     | d(49.80%) f(0.45%) |
|     | (85.39%)    | 0.9241* O 4 s(7.84%)   | p(92.04%)     | d(0.12%)           |
| 5.  | (1.97200)   | <b>BD (1) V 1- O 5</b> |               |                    |
|     | (26.94%)    | 0.5190* V 1 s(1.63%)   | p(1.10%)      | d(97.13%) f(0.14%) |
|     | (73.06%)    | 0.8547* O 5 s(8.64%)   | p(91.19%)     | d(0.17%)           |
| 6.  | (1.94901)   | <b>BD (2) V 1- O 5</b> |               |                    |
|     | (13.48%)    | 0.3671* V 1 s(15.78%)  | p(6.06%)      | d(77.61%) f(0.54%) |
|     | (86.52%)    | 0.9302* O 5 s(1.40%)   | p(98.53%)     | d(0.07%)           |
| 7.  | (1.91421)   | <b>BD (3) V 1- O 5</b> |               |                    |
|     | (17.19%)    | 0.4146* V 1 s(0.00%)   | p(37.88%)     | d(61.65%) f(0.48%) |
|     | (82.81%)    | 0.9100* O 5 s(0.00%)   | p(99.92%)     | d(0.08%)           |
| 8.  | (1.94607)   | <b>BD (1) O 3- O 4</b> |               |                    |
|     | (50.00%)    | 0.7071* O 3 s(6.35%)   | p(93.40%)     | d(0.25%)           |
|     | (50.00%)    | 0.7071* O 4 s(6.35%)   | p(93.40%)     | d(0.25%)           |
| 22. | (1.97237)   | <b>LP (1) O 2</b>      | s(89.95%)     | p(10.05%) d(0.00%) |
| 23. | (1.72684)   | <b>LP (2) O 2</b>      | s(1.53%)      | p(98.39%) d(0.08%) |
| 24. | (1.98099)   | <b>LP (1) O 3</b>      | s(85.95%)     | p(14.04%) d(0.00%) |
| 25. | (1.91907)   | <b>LP (2) O 3</b>      | s(0.00%)      | p(99.94%) d(0.06%) |
| 26. | (1.98099)   | <b>LP (1) O 4</b>      | s(85.95%)     | p(14.04%) d(0.00%) |
| 27. | (1.91907)   | <b>LP (2) O 4</b>      | s(0.00%)      | p(99.94%) d(0.06%) |
| 28. | (1.97237)   | <b>LP (1) O 5</b>      | s(89.95%)     | p(10.05%) d(0.00%) |

Second order perturbation theory analysis of Fock-matrix for *iso*-metavanadium peroxy acid conjugate base in NBO-basis(threshold for printing: 0.50 kcal/mol)

| Donor NBO (i)  | Acceptor NBO (j)      | kcal/mol | a.u. | a.u.  |
|----------------|-----------------------|----------|------|-------|
| 22. LP (1) O 2 | 91. BD* ( 1) V 1- O 3 | 6.11     | 1.07 | 0.074 |
| 22. LP (1) O 2 | 92. BD* ( 1) V 1- O 4 | 6.11     | 1.07 | 0.074 |
| 22. LP (1) O 2 | 94. BD* ( 2) V 1- O 5 | 12.21    | 0.98 | 0.106 |
| 23. LP (2) O 2 | 91. BD* ( 1) V 1- O 3 | 1.21     | 0.39 | 0.020 |
| 23. LP (2) O 2 | 92. BD* ( 1) V 1- O 4 | 1.21     | 0.39 | 0.020 |
| 23. LP (2) O 2 | 93. BD* ( 1) V 1- O 5 | 2.85     | 0.29 | 0.027 |
| 23. LP (2) O 2 | 94. BD* ( 2) V 1- O 5 | 59.43    | 0.31 | 0.122 |
| 24. LP (1) O 3 | 90. BD* ( 2) V 1- O 2 | 0.69     | 0.88 | 0.023 |
| 24. LP (1) O 3 | 91. BD* ( 1) V 1- O 3 | 1.06     | 0.97 | 0.030 |
| 24. LP (1) O 3 | 92. BD* ( 1) V 1- O 4 | 0.66     | 0.97 | 0.023 |
| 24. LP (1) O 3 | 93. BD* ( 1) V 1- O 5 | 0.50     | 0.86 | 0.019 |
| 24. LP (1) O 3 | 95. BD* ( 3) V 1- O 5 | 0.69     | 0.88 | 0.023 |
| 25. LP (2) O 3 | 89. BD* ( 1) V 1- O 2 | 7.51     | 0.30 | 0.042 |
| 25. LP (2) O 3 | 90. BD* ( 2) V 1- O 2 | 1.72     | 0.32 | 0.021 |
| 25. LP (2) O 3 | 93. BD* ( 1) V 1- O 5 | 7.62     | 0.30 | 0.043 |
| 25. LP (2) O 3 | 95. BD* ( 3) V 1- O 5 | 1.72     | 0.32 | 0.021 |
| 26. LP (1) O 4 | 90. BD* ( 2) V 1- O 2 | 0.69     | 0.88 | 0.023 |
| 26. LP (1) O 4 | 91. BD* ( 1) V 1- O 3 | 0.66     | 0.97 | 0.023 |
| 26. LP (1) O 4 | 92. BD* ( 1) V 1- O 4 | 1.06     | 0.97 | 0.030 |
| 26. LP (1) O 4 | 93. BD* ( 1) V 1- O 5 | 0.50     | 0.86 | 0.019 |
| 26. LP (1) O 4 | 95. BD* ( 3) V 1- O 5 | 0.69     | 0.88 | 0.023 |
| 27. LP (2) O 4 | 89. BD* ( 1) V 1- O 2 | 7.51     | 0.30 | 0.042 |
| 27. LP (2) O 4 | 90. BD* ( 2) V 1- O 2 | 1.72     | 0.32 | 0.021 |
| 27. LP (2) O 4 | 93. BD* ( 1) V 1- O 5 | 7.62     | 0.30 | 0.043 |
| 27. LP (2) O 4 | 95. BD* ( 3) V 1- O 5 | 1.72     | 0.32 | 0.021 |
| 28. LP (1) O 5 | 91. BD* ( 1) V 1- O 3 | 5.72     | 1.07 | 0.072 |
| 28. LP (1) O 5 | 92. BD* ( 1) V 1- O 4 | 5.72     | 1.07 | 0.072 |
| 28. LP (1) O 5 | 94. BD* ( 2) V 1- O 5 | 3.46     | 0.98 | 0.056 |

Natural bond orbital (NBO)-energies

| NBO                  | Occupancy | Energy / a.u. |
|----------------------|-----------|---------------|
| 1. BD (1) V 1- O 2   | 1.96453   | -0.29678      |
| 2. BD (2) V 1- O 2   | 1.91422   | -0.11641      |
| 3. BD (1) V 1- O 3   | 1.87527   | -0.24901      |
| 4. BD (1) V 1- O 4   | 1.87527   | -0.24901      |
| 5. BD (1) V 1- O 5   | 1.97200   | -0.30283      |
| 6. BD (2) V 1- O 5   | 1.94901   | -0.14716      |
| 7. BD (3) V 1- O 5   | 1.91421   | -0.11640      |
| 8. BD (1) O 3- O 4   | 1.94607   | -0.42145      |
| 96. BD* (1) O 3- O 4 | 0.03439   | 0.25587       |

## 7 Water Tetramer and Hydronium

### 7.1 Water tetramer

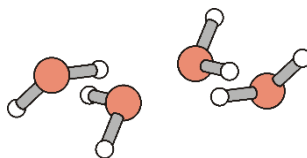

**Figure S11.** Calculated minimum structure of the water tetramer.

**B3LYP/6-311++G\*\*//B3LYP/6-311++G\*\***

Standard orientation:

| Center Number | Atomic Number | Atomic Type | Coordinates (Angstroms) |           |           |
|---------------|---------------|-------------|-------------------------|-----------|-----------|
|               |               |             | X                       | Y         | Z         |
| 1             | 8             | 0           | 1.475738                | -1.259589 | -0.090928 |
| 2             | 1             | 0           | 1.545602                | -0.280438 | -0.033546 |
| 3             | 8             | 0           | 1.269456                | 1.468206  | 0.087436  |
| 4             | 1             | 0           | -0.291787               | -1.563352 | -0.079322 |
| 5             | 8             | 0           | -1.269825               | -1.468690 | -0.085744 |
| 6             | 1             | 0           | 0.291490                | 1.563337  | 0.077172  |
| 7             | 8             | 0           | -1.475596               | 1.259308  | 0.088885  |
| 8             | 1             | 0           | -1.545609               | 0.280253  | 0.029501  |
| 9             | 1             | 0           | 2.114447                | -1.613419 | 0.534071  |
| 10            | 1             | 0           | -2.115704               | 1.614785  | -0.533743 |
| 11            | 1             | 0           | -1.605889               | -2.077864 | 0.577553  |
| 12            | 1             | 0           | 1.609274                | 2.082824  | -0.568874 |

Zero-point correction= 0.098501 (Hartree/Particle)  
Thermal correction to Energy= 0.108340  
Thermal correction to Enthalpy= 0.109284  
Thermal correction to Gibbs Free Energy= 0.064836  
Sum of electronic and zero-point Energies= -305.782999  
Sum of electronic and thermal Energies= -305.773160  
Sum of electronic and thermal Enthalpies= -305.772216  
Sum of electronic and thermal Free Energies= -305.816664

Version=AM64L-G03RevE.01\State=1-A\HF=-305.8815001\RMSD=1.268e-09\  
RMSF=3.048e-05\PG=C01 [X(H8O4)]\NImag=0\ \@.

## 7.2 Hydronium

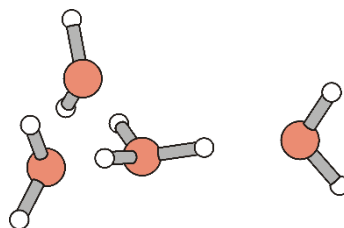

**Figure S12.** Calculated minimum structure of hydronium.

### B3LYP/6-311++G\*\*//B3LYP/6-311++G\*\*

Standard orientation:

| Center Number | Atomic Number | Atomic Type | Coordinates (Angstroms) |           |           |
|---------------|---------------|-------------|-------------------------|-----------|-----------|
|               |               |             | X                       | Y         | Z         |
| 1             | 8             | 0           | -0.000269               | 0.000029  | -0.370728 |
| 2             | 1             | 0           | 0.459282                | 0.872481  | -0.142283 |
| 3             | 1             | 0           | -0.985615               | -0.038265 | -0.142257 |
| 4             | 1             | 0           | 0.525586                | -0.834096 | -0.142200 |
| 5             | 8             | 0           | 1.336381                | -2.132160 | 0.100016  |
| 6             | 8             | 0           | -2.514934               | -0.090942 | 0.100070  |
| 7             | 8             | 0           | 1.178833                | 2.223083  | 0.100008  |
| 8             | 1             | 0           | 1.680940                | -2.689319 | -0.607744 |
| 9             | 1             | 0           | -3.169928               | -0.110960 | -0.607493 |
| 10            | 1             | 0           | 1.488770                | 2.800424  | -0.607586 |
| 11            | 1             | 0           | -2.989521               | -0.126895 | 0.938291  |
| 12            | 1             | 0           | 1.605056                | -2.525333 | 0.938099  |
| 13            | 1             | 0           | 1.385331                | 2.651881  | 0.938250  |

Zero-point correction= 0.107579 (Hartree/Particle)  
Thermal correction to Energy= 0.119188  
Thermal correction to Enthalpy= 0.120133  
Thermal correction to Gibbs Free Energy= 0.070256  
Sum of electronic and zero-point Energies= -306.129757  
Sum of electronic and thermal Energies= -306.118148  
Sum of electronic and thermal Enthalpies= -306.117204  
Sum of electronic and thermal Free Energies= -306.167081

Version=AM64L-G03RevE.01\State=1-A\HF=-306.2373365\RMSD=2.307e-09\  
RMSF=1.348e-05\PG=C01 [X(H9O4)]\NImag=0\ \@.

*Chemistry started by saying  
it would change baser metals into gold.  
By doing so,  
it has done much greater things.*

*- Ralph Waldo Emerson*

## 8 References

- (1) HyperChem(TM) Professional 7.51, Hypercube, Inc., 1115 NW 4th Street, Gainesville, Florida 32601, US.
- (2) Gaussian 03, Revision E.01, M. J. Frisch, G. W. Trucks, H. B. Schlegel, G. E. Scuseria, M. A. Robb, J. R. Cheeseman, J. A. Montgomery, Jr., T. Vreven, K. N. Kudin, J. C. Burant, J. M. Millam, S. S. Iyengar, J. Tomasi, V. Barone, B. Mennucci, M. Cossi, G. Scalmani, N. Rega, G. A. Petersson, H. Nakatsuji, M. Hada, M. Ehara, K. Toyota, R. Fukuda, J. Hasegawa, M. Ishida, T. Nakajima, Y. Honda, O. Kitao, H. Nakai, M. Klene, X. Li, J. E. Knox, H. P. Hratchian, J. B. Cross, V. Bakken, C. Adamo, J. Jaramillo, R. Gomperts, R. E. Stratmann, O. Yazyev, A. J. Austin, R. Cammi, C. Pomelli, J. W. Ochterski, P. Y. Ayala, K. Morokuma, G. A. Voth, P. Salvador, J. J. Dannenberg, V. G. Zakrzewski, S. Dapprich, A. D. Daniels, M. C. Strain, O. Farkas, D. K. Malick, A. D. Rabuck, K. Raghavachari, J. B. Foresman, J. V. Ortiz, Q. Cui, A. G. Baboul, S. Clifford, J. Cioslowski, B. B. Stefanov, G. Liu, A. Liashenko, P. Piskorz, I. Komaromi, R. L. Martin, D. J. Fox, T. Keith, M. A. Al-Laham, C. Y. Peng, A. Nanayakkara, M. Challacombe, P. M. W. Gill, B. Johnson, W. Chen, M. W. Wong, C. Gonzalez, and J. A. Pople, Gaussian, Inc., Wallingford CT, 2004.
- (3) O'Boyle, N.M., Banck, M., James, C.A., Morley, C., Vandermeersch T., Hutchison, G.R. (2011) Open Babel: An open chemical toolbox. *J. Cheminform.* 3, 33. DOI: 10.1186/1758-2946-3-33.
- (4) Gaussian 09, Revision D.01, M. J. Frisch, G. W. Trucks, H. B. Schlegel, G. E. Scuseria, M. A. Robb, J. R. Cheeseman, G. Scalmani, V. Barone, B. Mennucci, G. A. Petersson, H. Nakatsuji, M. Caricato, X. Li, H. P. Hratchian, A. F. Izmaylov, J. Bloino, G. Zheng, J. L. Sonnenberg, M. Hada, M. Ehara, K. Toyota, R. Fukuda, J. Hasegawa, M. Ishida, T. Nakajima, Y. Honda, O. Kitao, H. Nakai, T. Vreven, J. A. Montgomery, Jr., J. E. Peralta, F. Ogliaro, M. Bearpark, J. J. Heyd, E. Brothers, K. N. Kudin, V. N. Staroverov, T. Keith, R. Kobayashi, J. Normand, K. Raghavachari, A. Rendell, J. C. Burant, S. S. Iyengar, J. Tomasi, M. Cossi, N. Rega, J. M. Millam, M. Klene, J. E. Knox, J. B. Cross, V. Bakken, C. Adamo, J. Jaramillo, R. Gomperts, R. E. Stratmann, O. Yazyev, A. J. Austin, R. Cammi, C. Pomelli, J. W. Ochterski, R. L. Martin, K. Morokuma, V. G.

Zakrzewski, G. A. Voth, P. Salvador, J. J. Dannenberg, S. Dapprich, A. D. Daniels, O. Farkas, J. B. Foresman, J. V. Ortiz, J. Cioslowski, and D. J. Fox, Gaussian, Inc., Wallingford CT, 2013.
